# Supplementary material for: Factors Associated with Heritable Pulmonary Arterial Hypertension Exert Convergent Actions on the miR-130/301-Vascular Matrix Feedback Loop
Source: PubMed Central journal article supplement (PMC6121519; doi:10.3390/ijms19082289), 2018-08-04
Supplement: ijms-19-02289-s001.pdf [file ijms-19-02289-s001.pdf]

## Supplementary Material

### **Factors associated with heritable pulmonary arterial hypertension exert convergent actions on the miR-130/301-vascular matrix feedback loop**

Thomas Bertero, Adam L. Handen, and Stephen Y. Chan

**Table S1:** A catalog of each gene included in the network model along with the interacting network partners.

**Table S2:** Gene set enrichment analyses of genes within the PH and Fibrosis Networks interacting with miR-130/301 target genes and factors associated with heritable PAH.

**Table S3:** Gene set enrichment analyses of genes outside of the PH and Fibrosis Networks interacting with miR-130/301 target genes and factors associated with heritable PAH.

**Figure S1:** Efficiency of gene knockdown by inhibitory RNA in pulmonary vascular cell types.

**Table S1: A catalog of each gene included in the network model along with the interacting network partners.**

| Gene    | Interacting Partners                                                                                                                                                                                                                                                          |
|---------|-------------------------------------------------------------------------------------------------------------------------------------------------------------------------------------------------------------------------------------------------------------------------------|
| PTGS2   | HDAC1, VCP, FN1, SUMO1, EGFR, JUN, CTNNB1, CLTC, VDAC1, EP300, CAV1                                                                                                                                                                                                           |
| MOV10   | XRCC6, RAB5C, HIST1H1A, CAV1, RPA1, LRP8, LMO4, TAZ, RPA2, CTNNB1, STUB1, SFPQ, UBC, TRIP6, DBN1, VDAC1, FBXW7, RAF1, SH3KBP1, YAP1                                                                                                                                           |
| SUMO1   | PTGS2, JUN, PML, VCP, PPARG, KLF5, UBC, SOX2, YAP1                                                                                                                                                                                                                            |
| IQCB1   | XPO1, RAC1, VCP, YWHAB, HSP90AA1, ACTB, KRT8, RAF1, LOX                                                                                                                                                                                                                       |
| DBN1    | CAVIN1, MOV10, PPP1CC, FN1, PPP1CA, CD44, CLTC, ARRB2, FLOT1, FLOT2, SP1, CDH1, ACTB, CAV1                                                                                                                                                                                    |
| KCNK3   | YWHAB, EGR1                                                                                                                                                                                                                                                                   |
| CAV1    | PPP2R1A, CAVIN1, MOV10, ITCH, PTGS2, EGFR, VAPA, CTNNB1, LATS1, NOS3, CLTC, DBN1, VDAC1, KRT8, TMEM17, TFRC, CDH1, RAB7A, ACVRL1, NXF1, RAB5C, RAC1, CD44, PDIA3, VCP, PPARG, SMAD2, YIPF3, LRP6, PPP1CA, PPP2CA, RPA1, RPA2, BMPR2, FLOT1, FLOT2, UBC, HSP90AA1, ACTB, PTCH1 |
| STUB1   | PPP2R1A, MOV10, NXF1, EGFR, SMAD1, HIF1A, SMAD3, VCP, PPARG, ARRB2, SMAD2, UBC, HSP90AA1, RAF1, YAP1                                                                                                                                                                          |
| NROB2   | HDAC1, PPARG, FN1                                                                                                                                                                                                                                                             |
| TAZ     | BMP7, MOV10, LATS1, LRP6, NXF1                                                                                                                                                                                                                                                |
| CDH1    | HDAC1, SMAD7, EGFR, VAPA, CTNNB1, DBN1, KRT8, XRCC5, CAV1, STAT1, YWHAB, SH3KBP1, PPARG, GIPC1, EP300, YAP1, PPP1CA, CBL, CD2AP, BMPR2, FLOT1, UBC, TRIP6, HSP90AA1                                                                                                           |
| RAB5C   | RAB7A, MOV10, NXF1, FN1, PHB2, RPA1, CAVIN1, VAPA, RPA2, TFRC, ARRB2, FLOT1, FLOT2, VDAC1, SMARCA4, CAV1                                                                                                                                                                      |
| SP1     | HDAC1, COL1A1, NXF1, IGFBP3, SMAD3, JUN, HIF1A, HMGA1, CTNNB1, PPARG, SFPQ, COL3A1, EGR1, DBN1, PML, HSP90AA1, PIN1, EP300, SMARCA4, SMAD2                                                                                                                                    |
| VAPA    | CAVIN1, RAB5C, FN1, PHB2, EGFR, VCP, FLOT1, FLOT2, CDH1, VDAC1, SMARCA4, CAV1                                                                                                                                                                                                 |
| GIPC1   | CDH1, LRP8, ENG                                                                                                                                                                                                                                                               |
| BMP7    | SMAD3, BMPR2, SMAD1, TAZ, ENG                                                                                                                                                                                                                                                 |
| FN1     | HDAC1, PPP2R1A, PTGS2, PHB2, EGFR, HIF1A, CLTC, TRIB3, DBN1, KRT8, XRCC5, XRCC6, XPO1, NROB2, TFRC, YWHAB, YWHAG, RAB7A, ELN, RAB5C, RAC1, CD44, HMGA1, VCP, IGFBP3, SFPQ, VAPA, PPP1CA, PPP2CA, RPA1, RPA2, STAT5A, FLOT1, FLOT2, UBC, HSP90AA1, ACTB, CSNK2B, TUFM          |
| PPP2CA  | PPP2R1A, FN1, RAC1, EGR1, RPA1, RPA2, VCP, PIN1, EP300, RAF1, CSNK2B, CAV1                                                                                                                                                                                                    |
| SH3KBP1 | MOV10, NXF1, EGFR, RPA1, CBL, CD2AP, CLTC, UBC, CDH1, LOX, RAF1                                                                                                                                                                                                               |
| BMPR2   | BMP7, CD44, PPP1CC, TSR1, GDF2, SMAD6, SMAD7, TRIB3, CDH1, CAV1                                                                                                                                                                                                               |
| UBC     | PPP2R1A, CAVIN1, MOV10, ITCH, SUMO1, EGFR, SMAD1, ARRB2, HIST2H2BE, VDAC1, CD2AP, CAV1, CDH1, STUB1, JUN, NUP43, YWHAB, SH3KBP1, NXF1, RAC1, YWHAG, VCP, PPARG, SFPQ, EP300, FN1, RPA1, CBL, RPA2, FLOT1, FLOT2, COL1A1, TUFM                                                 |
| TRIP6   | XPO1, MOV10, ENG, CDH1, PIN1, YAP1                                                                                                                                                                                                                                            |

|         |                                                                                                                                                                                                                            |
|---------|----------------------------------------------------------------------------------------------------------------------------------------------------------------------------------------------------------------------------|
| ACTB    | VCP, NOS3, SMAD9, PPP1CC, FN1, PPP1CA, EGFR, IQCB1, RPA1, CBL, SMAD3, CTNNB1, ARRB2, RAC1, RPA2, DBN1, EP300, SMARCA4, CSNK2B, CAV1                                                                                        |
| CAVIN1  | RAB7A, RAB5C, JUN, EGFR, VAPA, FLOT2, UBC, DBN1, YAP1, CAV1                                                                                                                                                                |
| HIF1A   | HDAC1, VCP, FN1, ENG, STUB1, SP1, EGR1, JUN, SMAD3, CTNNB1, HSP90AA1, EP300, SMARCA4, FBXW7                                                                                                                                |
| EIF2AK4 | ARRB2, PPP1CC, PPP1CA                                                                                                                                                                                                      |
| CLTC    | PPP2R1A, XRCC6, PPP1CC, FN1, PPP1CA, PHB2, RAC1, RPA1, PTGS2, RPA2, NXF1, ARRB2, DBN1, VDAC1, EP300, SH3KBP1, TUFM, CAV1                                                                                                   |
| TRIB3   | BMPR2, CSNK2B, FN1, SMAD3                                                                                                                                                                                                  |
| COL3A1  | SP1                                                                                                                                                                                                                        |
| CD2AP   | EGFR, CBL, UBC, CDH1, LOX, SH3KBP1                                                                                                                                                                                         |
| XRCC5   | XRCC6, FN1, CDH1, RPA1, EGFR, CBL, RPA2, PPARG, ARRB2, KAT2A, SOX2, VDAC1, EP300, YAP1                                                                                                                                     |
| XRCC6   | MOV10, NXF1, FN1, PDIA3, SMAD7, RPA1, KAT2A, HMGA1, SMAD3, PPARG, ARRB2, CLTC, RPA2, VDAC1, EP300, XRCC5, PIN1, YAP1                                                                                                       |
| XPO1    | ASH2L, NXF1, STAT1, FN1, PPP1CA, TRIP6, IQCB1, EGFR, SMAD1, CBL, CSNK2B, CTNNB1, PPARG, KLF5, ARRB2, SOX2, HSP90AA1, RAF1, YWHAG, TUFM, YAP1                                                                               |
| APOE    | LRP8, NOS3, VDAC1                                                                                                                                                                                                          |
| EGR1    | HDAC1, MAP2K1, ENG, PPP2CA, JUN, SMAD7, EGFR, SMAD1, HIF1A, KCNK3, CTNNB1, SMAD3, KLF5, CBL, SP1, CD44, EP300, YAP1                                                                                                        |
| JUN     | HDAC1, PTGS2, CAVIN1, ITCH, SUMO1, HIF1A, SMAD3, CTNNB1, PIN1, STAT1, EGR1, KLF5, PML, FBXW7, SP1, HMGA1, PPARG, SMAD2, EP300, YAP1, UBC, HSP90AA1                                                                         |
| SOX17   | CTNNB1                                                                                                                                                                                                                     |
| TFRC    | RAB7A, TMEM17, FN1, RPA1, EGFR, RPA2, RAB5C, CAV1                                                                                                                                                                          |
| RAB7A   | PPP2R1A, CAVIN1, TMEM17, FN1, PHB2, RPA1, RPA2, VCP, RAB5C, TFRC, FLOT1, FLOT2, VDAC1, CAV1                                                                                                                                |
| ACVRL1  | HSP90AA1, ENG, SMAD1, CSNK2B, CAV1                                                                                                                                                                                         |
| NXF1    | XPO1, XRCC6, RAB5C, STUB1, SP1, LRP8, LMO4, SFPQ, TAZ, CSNK2B, CTNNB1, YAP1, CLTC, UBC, HSP90AA1, VDAC1, CAV1, RAF1, SH3KBP1, FBXW7                                                                                        |
| ENG     | BMP7, ACVRL1, EGR1, HIF1A, ARRB2, TRIP6, GIPC1, TUFM                                                                                                                                                                       |
| PPARG   | HDAC1, ASH2L, PHB2, EGFR, KAT2A, SMAD3, CTNNB1, MAP2K1, PIN1, SMAD2, XRCC5, CAV1, XPO1, STAT1, CDH1, STUB1, SMARCA4, JUN, SUMO1, KLF5, YWHAB, PML, XRCC6, YWHAG, SP1, HMGA1, IGFBP3, SFPQ, NROB2, EP300, LMO4, STAT5A, UBC |
| SFPQ    | HDAC1, MOV10, UBC, FN1, PPP1CA, EGFR, RAC1, RPA1, RPA2, PPARG, ARRB2, SP1, PIN1, NXF1                                                                                                                                      |
| YIPF3   | ATP13A3, CAV1                                                                                                                                                                                                              |
| IGFBP3  | FN1, CD44, HMGA1, PPARG, SP1, COL1A1                                                                                                                                                                                       |
| CBL     | XPO1, EGR1, ITCH, SMAD7, EGFR, SMAD3, CTNNB1, CDH1, STAT5A, FLOT1, UBC, YWHAB, ACTB, CD2AP, XRCC5, SH3KBP1, LOX                                                                                                            |
| FLOT1   | RAB7A, RAB5C, FN1, CBL, VAPA, FLOT2, UBC, CDH1, DBN1, CAV1                                                                                                                                                                 |

|          |                                                                                                                                                                                                                                                                         |
|----------|-------------------------------------------------------------------------------------------------------------------------------------------------------------------------------------------------------------------------------------------------------------------------|
| FLOT2    | RAB7A, TMEM17, RAB5C, FN1, CD44, EGFR, CAVIN1, VAPA, FLOT1, UBC, DBN1, VDAC1, CAV1                                                                                                                                                                                      |
| HDAC1    | PPP2R1A, PTGS2, PHB2, SMAD7, EGFR, SMAD1, HIF1A, SMAD3, CTNNB1, SOX2, PIN1, PML, SMARCA4, STAT1, NROB2, EGR1, JUN, KLF5, CDH1, SP1, PPARG, SFPQ, SMAD2, EP300, YAP1, PPP1CC, FN1, PPP1CA, LMO4, STAT5A, CSNK2B                                                          |
| SMAD9    | ASH2L, SMAD7, LMO4, KAT2A, SMAD3, SMAD2, ACTB                                                                                                                                                                                                                           |
| ASH2L    | XPO1, PPP1CC, CTNNB1, PPARG, EP300, SMAD9                                                                                                                                                                                                                               |
| SMAD6    | ITCH, SMAD7, SMAD1, SMAD2, BMPR2, YAP1                                                                                                                                                                                                                                  |
| SMAD7    | HDAC1, SMAD9, ITCH, SMAD6, EGR1, XRCC6, SMAD1, CBL, SMAD3, CTNNB1, BMPR2, SMAD2, CDH1, EP300, YAP1                                                                                                                                                                      |
| SMAD1    | BMP7, XPO1, ACVRL1, STUB1, SMAD6, SMAD7, KAT2A, SMAD3, SMAD2, EGR1, UBC, EP300, HDAC1, YAP1                                                                                                                                                                             |
| SMAD2    | HDAC1, PPP2R1A, SMAD9, ITCH, SMAD6, SMAD7, SMAD1, KAT2A, SMAD3, CTNNB1, PIN1, SMARCA4, CAV1, STUB1, JUN, KLF5, PML, SP1, PPARG, EP300, YAP1, COL1A1                                                                                                                     |
| SMAD3    | HDAC1, PPP2R1A, SMAD9, ITCH, SMAD7, SMAD1, KAT2A, CTNNB1, TRIB3, PIN1, SMAD2, SMARCA4, XRCC6, STUB1, EGR1, JUN, KLF5, PML, SP1, PPARG, HIF1A, EP300, YAP1, BMP7, RPA1, CBL, COL1A1, ACTB                                                                                |
| ARRB2    | PPP2R1A, ITCH, EGFR, MAP2K1, CLTC, DBN1, XRCC5, XRCC6, XPO1, STAT1, STUB1, RAF1, YWHAB, YWHAG, RAB5C, ENG, VCP, SFPQ, HIST1H1A, RPA1, EIF2AK4, UBC, ACTB                                                                                                                |
| TBX4     | NUP43, FBXW7                                                                                                                                                                                                                                                            |
| VDAC1    | PTGS2, RAB7A, NOS3, MOV10, CLTC, RAB5C, PHB2, RAF1, VAPA, NXF1, APOE, FLOT2, UBC, XRCC6, XRCC5, CSNK2B, CAV1                                                                                                                                                            |
| KRT8     | CDH1, IQCB1, FN1, CAV1                                                                                                                                                                                                                                                  |
| RAF1     | XPO1, PPP2R1A, MOV10, PPP1CC, PPP2CA, IQCB1, EGFR, MAP2K1, SH3KBP1, VCP, STUB1, LATS1, ARRB2, YWHAB, HSP90AA1, LOX, VDAC1, YWHAG, PIN1, NXF1                                                                                                                            |
| TMEM17   | RAB7A, LRP6, LRP8, TFRC, FLOT2, CAV1                                                                                                                                                                                                                                    |
| STAT1    | XPO1, HDAC1, CDH1, JUN, EGFR, VCP, PPARG, STAT5A, ARRB2, PML, EP300, SMARCA4, YAP1                                                                                                                                                                                      |
| PML      | HDAC1, STAT1, SUMO1, JUN, EGFR, SMAD2, SMAD3, CTNNB1, PPARG, SP1, PIN1, SMARCA4, CSNK2B, YAP1                                                                                                                                                                           |
| FBXW7    | MOV10, NXF1, JUN, HIF1A, CTNNB1, KLF5, TBX4, HSP90AA1, PIN1, YAP1                                                                                                                                                                                                       |
| ELN      | LOX, FN1                                                                                                                                                                                                                                                                |
| HMGA1    | FN1, IGFBP3, EGFR, JUN, PPARG, SP1, HSP90AA1, XRCC6                                                                                                                                                                                                                     |
| KAT2A    | SMAD9, SMAD1, SMAD2, SMAD3, CTNNB1, PPARG, HIST2H2BE, XRCC5, XRCC6                                                                                                                                                                                                      |
| EP300    | HDAC1, PTGS2, CLTC, ASH2L, SMAD7, SMAD1, SMAD2, SMAD3, CTNNB1, HIST2H2BE, PIN1, XRCC5, XRCC6, STAT1, EGR1, JUN, KLF5, SP1, CDH1, CD44, PPARG, HIF1A, HIST1H1A, YAP1, PPP2CA, STAT5A, UBC, ACTB                                                                          |
| HIST1H1A | MOV10, LOX, EP300, ARRB2                                                                                                                                                                                                                                                |
| YAP1     | HDAC1, PPP2R1A, CAVIN1, MOV10, ITCH, SUMO1, SMAD6, SMAD7, EGFR, SMAD1, SMAD2, SMAD3, CTNNB1, LATS1, PIN1, SMARCA4, XRCC6, XPO1, STAT1, TSR1, XRCC5, EGR1, JUN, PHB2, KLF5, YWHAB, CDH1, YWHAG, FBXW7, NXF1, PDIA3, VCP, PML, EP300, PPP1CA, MAP2K1, STUB1, TRIP6, PTCH1 |

|           |                                                                                                                                                                                                                                                                           |
|-----------|---------------------------------------------------------------------------------------------------------------------------------------------------------------------------------------------------------------------------------------------------------------------------|
| LRP6      | CTNNB1, TMEM17, TAZ, CAV1                                                                                                                                                                                                                                                 |
| LRP8      | APOE, MOV10, TMEM17, EGFR, GIPC1, NXF1                                                                                                                                                                                                                                    |
| LMO4      | HDAC1, MOV10, NXF1, PPARG, CSNK2B, SMAD9                                                                                                                                                                                                                                  |
| MAP2K1    | EGR1, VCP, PPARG, ARRB2, YWHAB, RAF1, YAP1                                                                                                                                                                                                                                |
| STAT5A    | HDAC1, STAT1, FN1, EGFR, CBL, PPARG, EP300, SMARCA4, CSNK2B                                                                                                                                                                                                               |
| COL1A1    | SP1, EGFR, SMAD2, SMAD3, IGFBP3, UBC                                                                                                                                                                                                                                      |
| HSP90AA1  | XPO1, PPP2R1A, NOS3, NXF1, FN1, STUB1, EGFR, IQCB1, JUN, HIF1A, HMGA1, VCP, ACVRL1, SP1, CDH1, CAV1, RAF1, TUFM, FBXW7                                                                                                                                                    |
| CSNK2B    | HDAC1, PPP2R1A, ACVRL1, NXF1, FN1, PPP1CA, PPP2CA, LMO4, XPO1, RPA1, VCP, STAT5A, TRIB3, PML, ACTB, VDAC1, PPP1CC                                                                                                                                                         |
| PPP2R1A   | HDAC1, RAB7A, FN1, PPP2CA, EGFR, SMAD2, SMAD3, VCP, STUB1, ARRB2, CLTC, UBC, HSP90AA1, YAP1, RAF1, CSNK2B, CAV1                                                                                                                                                           |
| ITCH      | PTCH1, JUN, SMAD6, SMAD7, EGFR, CBL, SMAD3, LATS1, ARRB2, SMAD2, UBC, YAP1, CAV1                                                                                                                                                                                          |
| PHB2      | HDAC1, RAB7A, RAB5C, FN1, VAPA, CTNNB1, PPARG, CLTC, VDAC1, TUFM, YAP1                                                                                                                                                                                                    |
| EGFR      | HDAC1, PPP2R1A, CAVIN1, ITCH, PTGS2, VAPA, PML, CTNNB1, ARRB2, CD2AP, XRCC5, CAV1, XPO1, STAT1, CDH1, STUB1, RAF1, EGR1, TFRC, YWHAB, SH3KBP1, CD44, COL1A1, PDIA3, HMGA1, PPARG, SFPQ, YAP1, FN1, LRP8, RPA1, CBL, RPA2, STAT5A, FLOT2, UBC, HSP90AA1, ACTB, PTCH1, TUFM |
| CTNNB1    | HDAC1, PTGS2, MOV10, ASH2L, PHB2, SMAD7, EGFR, HIF1A, PML, SOX2, PIN1, SMAD2, SMARCA4, CAV1, XPO1, EGR1, JUN, SOX17, KLF5, CDH1, FBXW7, NXF1, SP1, SMAD3, PPARG, KAT2A, EP300, YAP1, LRP6, CBL, ACTB                                                                      |
| LATS1     | PPP1CC, ITCH, RAC1, PPP1CA, TAZ, YAP1, RAF1, CAV1                                                                                                                                                                                                                         |
| HIST2H2BE | LOX, EP300, SMARCA4, KAT2A, UBC                                                                                                                                                                                                                                           |
| SOX2      | HDAC1, XPO1, SUMO1, CTNNB1, LOX, XRCC5                                                                                                                                                                                                                                    |
| LOX       | ELN, HIST1H1A, IQCB1, CBL, CD2AP, HIST2H2BE, SOX2, RAF1, SH3KBP1                                                                                                                                                                                                          |
| SMARCA4   | HDAC1, STAT1, RAB5C, SP1, HIF1A, SMAD3, CTNNB1, PPARG, STAT5A, VAPA, HIST2H2BE, PML, ACTB, SMAD2, YAP1                                                                                                                                                                    |
| PIN1      | HDAC1, XRCC6, PPP2CA, SP1, JUN, TRIP6, SMAD3, CTNNB1, PPARG, SFPQ, SMAD2, PML, YAP1, EP300, RAF1, FBXW7                                                                                                                                                                   |
| TSR1      | BMPR2, RPA2, RPA1, YAP1                                                                                                                                                                                                                                                   |
| GDF2      | BMPR2                                                                                                                                                                                                                                                                     |
| ATP13A3   | YIPF3                                                                                                                                                                                                                                                                     |
| NUP43     | TBX4, UBC                                                                                                                                                                                                                                                                 |
| KLF5      | XPO1, HDAC1, SUMO1, EGR1, JUN, SMAD2, SMAD3, CTNNB1, PPARG, YAP1, EP300, FBXW7                                                                                                                                                                                            |
| YWHAB     | FN1, IQCB1, EGFR, CBL, KCNK3, VCP, PPARG, MAP2K1, ARRB2, UBC, CDH1, RAF1, YWHAG, YAP1                                                                                                                                                                                     |
| YWHAG     | XPO1, FN1, VCP, PPARG, ARRB2, UBC, YWHAB, RAF1, YAP1                                                                                                                                                                                                                      |
| NOS3      | HSP90AA1, ACTB, APOE, VDAC1, CAV1                                                                                                                                                                                                                                         |
| RAC1      | FN1, PPP2CA, IQCB1, LATS1, SFPQ, CLTC, UBC, ACTB, CAV1                                                                                                                                                                                                                    |
| CD44      | FN1, EGR1, EGFR, IGFBP3, BMPR2, FLOT2, DBN1, EP300, CAV1                                                                                                                                                                                                                  |

|        |                                                                                                                                                                       |
|--------|-----------------------------------------------------------------------------------------------------------------------------------------------------------------------|
| PDIA3  | XRCC6, CAV1, EGFR, YAP1                                                                                                                                               |
| VCP    | PPP2R1A, PTGS2, SUMO1, IQCB1, HIF1A, MAP2K1, ARRB2, RAF1, CAV1, STAT1, STUB1, YWHAB, YWHAG, RAB7A, VAPA, YAP1, PPP1CC, FN1, PPP2CA, RPA2, UBC, HSP90AA1, ACTB, CSNK2B |
| PPP1CC | HDAC1, PPP1CA, ASH2L, RPA1, EIF2AK4, RPA2, VCP, LATS1, BMPR2, CLTC, DBN1, ACTB, RAF1, CSNK2B                                                                          |
| PPP1CA | HDAC1, XPO1, PPP1CC, FN1, EIF2AK4, SFPQ, CLTC, CDH1, DBN1, ACTB, YAP1, CSNK2B, LATS1, CAV1                                                                            |
| RPA1   | RAB7A, MOV10, PPP1CC, FN1, XRCC6, PPP2CA, EGFR, TSR1, CSNK2B, SMAD3, RAB5C, SFPQ, TFRC, ARRB2, CLTC, UBC, ACTB, RPA2, XRCC5, SH3KBP1, CAV1                            |
| RPA2   | RAB7A, MOV10, PPP1CC, FN1, PPP2CA, EGFR, RPA1, TSR1, VCP, RAB5C, SFPQ, TFRC, CLTC, UBC, ACTB, XRCC6, XRCC5, CAV1                                                      |
| PTCH1  | CAV1, EGFR, ITCH, YAP1                                                                                                                                                |
| TUFM   | XPO1, FN1, ENG, PHB2, EGFR, CLTC, UBC, HSP90AA1                                                                                                                       |

**Table S2: Gene set enrichment analyses of genes within the PH and Fibrosis Networks interacting with miR-130/301 target genes and factors associated with heritable PAH.**

Pathways are listed in order of lowest to highest FDR p-value (Q).

| Source   | Annotation                                   | Size | P        | Q        | Genes                                                                                                                                                                                                                                             |
|----------|----------------------------------------------|------|----------|----------|---------------------------------------------------------------------------------------------------------------------------------------------------------------------------------------------------------------------------------------------------|
| GO       | protein binding                              | 9409 | 3.78E-11 | 6.75E-07 | KRT8 RPA1 CLTC VAPA HMGA1 PML SFPQ TUFM IQCB1 PPP2R1A RPA2 PTCH1 GIPC1 CD2AP FLOT2 LATS1 ASH2L CDH1 PPP2CA HIST1H1A TRIP6 CBL TFRC TRIB3 RAB5C SH3KBP1 CAVIN1 NROB2 KAT2A SUMO1 NXF1 RAB7A ITCH PDIA3 LMO4 MAP2K1 PHB2 MOV10 SOX2 XRCC5 UBC YWHAG |
| REACTOME | Gene expression (Transcription)              | 1330 | 1.05E-07 | 4.54E-05 | RPA2 PPP2CA RPA1 UBC HIST2H2BE CAVIN1 PML MOV10 NROB2 ASH2L ITCH PPP2R1A KAT2A SUMO1 YWHAG                                                                                                                                                        |
| REACTOME | Listeria monocytogenes entry into host cells | 19   | 8.45E-08 | 4.54E-05 | CBL SH3KBP1 CDH1 UBC                                                                                                                                                                                                                              |
| REACTOME | Immune System                                | 1945 | 7.35E-08 | 4.57E-05 | PDIA3 PPP2CA MAP2K1 SH3KBP1 CBL CLTC VAPA TRIB3 RAB5C PML XRCC5 RAB7A UBC ITCH PPP2R1A SOX2 SUMO1 CDH1                                                                                                                                            |
| REACTOME | Spry regulation of FGF signaling             | 14   | 2.2E-08  | 4.76E-05 | PPP2R1A PPP2CA CBL UBC                                                                                                                                                                                                                            |
| REACTOME | Cell Cycle Checkpoints                       | 270  | 1.39E-07 | 5.02E-05 | RPA2 PPP2CA RPA1 HIST2H2BE UBC PPP2R1A SUMO1 YWHAG                                                                                                                                                                                                |
| REACTOME | Signal Transduction                          | 2598 | 2.13E-07 | 5.11E-05 | SOX2 PPP2CA PTCH1 MAP2K1 CLTC CBL UBC HIST2H2BE SH3KBP1 MOV10 TRIB3 ITCH PML SFPQ ASH2L LATS1 PPP2R1A KAT2A CDH1 YWHAG                                                                                                                            |
| REACTOME | RNA Polymerase II Transcription              | 1196 | 2.01E-07 | 5.11E-05 | RPA2 PPP2CA RPA1 UBC HIST2H2BE MOV10 PML NROB2 ASH2L ITCH PPP2R1A KAT2A SUMO1 YWHAG                                                                                                                                                               |
| REACTOME | Generic Transcription Pathway                | 1074 | 5.32E-08 | 5.3E-05  | RPA2 PPP2CA RPA1 UBC HIST2H2BE MOV10 PML NROB2 ASH2L ITCH PPP2R1A KAT2A SUMO1 YWHAG                                                                                                                                                               |
| REACTOME | Negative regulation of FGFR3 signaling       | 23   | 1.92E-07 | 5.44E-05 | PPP2R1A PPP2CA CBL UBC                                                                                                                                                                                                                            |
| REACTOME | Signaling by WNT                             | 294  | 2.67E-07 | 5.77E-05 | PPP2CA HIST2H2BE UBC CLTC MOV10 SOX2 ASH2L PPP2R1A                                                                                                                                                                                                |
| REACTOME | Negative regulation of FGFR1 signaling       | 26   | 3.22E-07 | 6.34E-05 | PPP2R1A PPP2CA CBL UBC                                                                                                                                                                                                                            |

|          |                                                                            |     |          |          |                                                                 |
|----------|----------------------------------------------------------------------------|-----|----------|----------|-----------------------------------------------------------------|
| REACTOME | Negative regulation of FGFR4 signaling                                     | 27  | 3.78E-07 | 6.81E-05 | PPP2R1A PPP2CA CBL UBC                                          |
| REACTOME | Negative regulation of FGFR2 signaling                                     | 28  | 4.4E-07  | 7.33E-05 | PPP2R1A PPP2CA CBL UBC                                          |
| REACTOME | Adaptive Immune System                                                     | 743 | 5.53E-07 | 8.54E-05 | PPP2CA CBL CLTC PDIA3 TRIB3 SH3KBP1 RAB7A UBC ITCH PPP2R1A CDH1 |
| REACTOME | Clathrin-mediated endocytosis                                              | 138 | 6.32E-07 | 9.11E-05 | CLTC CBL TFRC RAB5C SH3KBP1 UBC                                 |
| REACTOME | G2/M DNA damage checkpoint                                                 | 76  | 7.52E-07 | 0.000102 | SUMO1 RPA2 YWHAG RPA1 HIST2H2BE                                 |
| REACTOME | Processing of DNA double-strand break ends                                 | 79  | 9.13E-07 | 0.000104 | SUMO1 RPA2 UBC RPA1 HIST2H2BE                                   |
| REACTOME | DNA Double-Strand Break Repair                                             | 146 | 8.79E-07 | 0.000104 | RPA2 RPA1 HIST2H2BE XRCC5 UBC SUMO1                             |
| REACTOME | Signaling by FGFR3                                                         | 33  | 8.72E-07 | 0.000106 | PPP2R1A PPP2CA CBL UBC                                          |
| REACTOME | G2/M Checkpoints                                                           | 149 | 9.91E-07 | 0.000107 | RPA2 RPA1 HIST2H2BE UBC SUMO1 YWHAG                             |
| REACTOME | Transcriptional Regulation by TP53                                         | 359 | 1.2E-06  | 0.000123 | RPA2 PPP2CA RPA1 MOV10 PML UBC PPP2R1A YWHAG                    |
| REACTOME | Signaling by FGFR4                                                         | 36  | 1.25E-06 | 0.000123 | PPP2R1A PPP2CA CBL UBC                                          |
| REACTOME | Infectious disease                                                         | 368 | 1.45E-06 | 0.000135 | MAP2K1 CBL CLTC HMGA1 SH3KBP1 XRCC5 UBC CDH1                    |
| REACTOME | Regulation of TP53 Activity                                                | 160 | 1.5E-06  | 0.000135 | RPA2 PPP2CA RPA1 PML UBC PPP2R1A                                |
| REACTOME | Negative regulation of MAPK pathway                                        | 40  | 1.93E-06 | 0.000167 | PPP2R1A PPP2CA UBC MAP2K1                                       |
| REACTOME | Signaling by FGFR1                                                         | 42  | 2.35E-06 | 0.000196 | PPP2R1A PPP2CA CBL UBC                                          |
| REACTOME | Cargo recognition for clathrin-mediated endocytosis                        | 98  | 2.67E-06 | 0.000206 | TFRC CBL CLTC SH3KBP1 UBC                                       |
| REACTOME | Formation of Incision Complex in GG-NER                                    | 43  | 2.59E-06 | 0.000206 | SUMO1 RPA2 RPA1 UBC                                             |
| REACTOME | InIB-mediated entry of Listeria monocytogenes into host cell               | 14  | 3.81E-06 | 0.000284 | CBL SH3KBP1 UBC                                                 |
| REACTOME | Signaling by Receptor Tyrosine Kinases                                     | 433 | 4.83E-06 | 0.000349 | PPP2CA CBL CLTC TRIB3 SH3KBP1 UBC ITCH PPP2R1A                  |
| REACTOME | HDR through Homologous Recombination (HR) or Single Strand Annealing (SSA) | 112 | 5.14E-06 | 0.000359 | SUMO1 RPA2 UBC RPA1 HIST2H2BE                                   |
| REACTOME | TCF dependent signaling in response to WNT                                 | 199 | 5.31E-06 | 0.000359 | ASH2L PPP2CA HIST2H2BE SOX2 UBC PPP2R1A                         |
| REACTOME | Translesion synthesis by REV1                                              | 16  | 5.84E-06 | 0.000372 | RPA2 RPA1 UBC                                                   |



|          |                                                         |      |          |          |                                                                   |
|----------|---------------------------------------------------------|------|----------|----------|-------------------------------------------------------------------|
| REACTOME | Transcriptional regulation by RUNX1                     | 202  | 5.78E-06 | 0.000372 | HIST2H2BE MOV10 PML UBC ITCH ASH2L                                |
| REACTOME | Homology Directed Repair                                | 118  | 6.64E-06 | 0.000411 | SUMO1 RPA2 UBC RPA1 HIST2H2BE                                     |
| REACTOME | Translesion synthesis by POLI                           | 17   | 7.08E-06 | 0.000414 | RPA2 RPA1 UBC                                                     |
| REACTOME | Translesion synthesis by POLK                           | 17   | 7.08E-06 | 0.000414 | RPA2 RPA1 UBC                                                     |
| KEGG     | ENDOCYTOSIS                                             | 181  | 3.07E-06 | 0.000571 | CLTC CBL TFRC RAB5C SH3KBP1 ITCH                                  |
| REACTOME | Translesion Synthesis by POLH                           | 19   | 1.01E-05 | 0.000573 | RPA2 RPA1 UBC                                                     |
| REACTOME | G1/S Transition                                         | 130  | 1.07E-05 | 0.000591 | PPP2R1A PPP2CA UBC RPA1 RPA2                                      |
| REACTOME | Disease                                                 | 1017 | 1.15E-05 | 0.000621 | PPP2CA MAP2K1 CBL CLTC HMGA1 SH3KBP1 XRCC5 UBC PPP2R1A KAT2A CDH1 |
| REACTOME | Negative regulation of MET activity                     | 20   | 1.18E-05 | 0.000623 | CBL SH3KBP1 UBC                                                   |
| REACTOME | MAP kinase activation                                   | 63   | 1.21E-05 | 0.000623 | PPP2R1A PPP2CA UBC MAP2K1                                         |
| REACTOME | Signaling by FGFR2                                      | 66   | 1.46E-05 | 0.000732 | PPP2R1A PPP2CA CBL UBC                                            |
| REACTOME | PIP3 activates AKT signaling                            | 240  | 1.54E-05 | 0.00076  | PPP2CA MOV10 TRIB3 PML UBC PPP2R1A                                |
| REACTOME | Interleukin-17 signaling                                | 71   | 1.95E-05 | 0.000916 | PPP2R1A PPP2CA UBC MAP2K1                                         |
| REACTOME | Mitotic G1-G1/S phases                                  | 147  | 1.93E-05 | 0.000916 | PPP2R1A PPP2CA UBC RPA1 RPA2                                      |
| REACTOME | EGFR downregulation                                     | 24   | 2.08E-05 | 0.00094  | CBL SH3KBP1 UBC                                                   |
| REACTOME | RAF activation                                          | 24   | 2.08E-05 | 0.00094  | PPP2R1A PPP2CA MAP2K1                                             |
| REACTOME | Cellular responses to stress                            | 386  | 2.28E-05 | 0.001006 | RPA2 HIST1H1A RPA1 HIST2H2BE MOV10 HMGA1 UBC                      |
| REACTOME | Gap-filling DNA repair synthesis and ligation in GG-NER | 25   | 2.36E-05 | 0.001023 | RPA2 RPA1 UBC                                                     |
| REACTOME | Signaling by FGFR                                       | 77   | 2.68E-05 | 0.001139 | PPP2R1A PPP2CA CBL UBC                                            |
| REACTOME | Cellular Senescence                                     | 160  | 2.9E-05  | 0.001208 | HIST1H1A HIST2H2BE MOV10 HMGA1 UBC                                |
| REACTOME | Intracellular signaling by second messengers            | 271  | 3.06E-05 | 0.00125  | PPP2CA MOV10 TRIB3 PML UBC PPP2R1A                                |
| GO       | focal adhesion                                          | 402  | 2.29E-07 | 0.001361 | PDIA3 TRIP6 MAP2K1 CBL CLTC HMGA1 SH3KBP1 FLOT2 YWHAG             |
| GO       | endocytic vesicle                                       | 59   | 2.1E-07  | 0.001361 | SH3KBP1 RAB5C GIPC1 FLOT2 CD2AP                                   |
| REACTOME | Toll Like Receptor 5 (TLR5) Cascade                     | 85   | 3.96E-05 | 0.001505 | PPP2R1A PPP2CA UBC MAP2K1                                         |
| REACTOME | Toll Like Receptor 10 (TLR10) Cascade                   | 85   | 3.96E-05 | 0.001505 | PPP2R1A PPP2CA UBC MAP2K1                                         |
| REACTOME | Global Genome Nucleotide Excision Repair (GG-NER)       | 84   | 3.78E-05 | 0.001516 | SUMO1 RPA2 RPA1 UBC                                               |

|          |                                                                              |      |          |          |                                                                                                            |
|----------|------------------------------------------------------------------------------|------|----------|----------|------------------------------------------------------------------------------------------------------------|
| REACTOME | MyD88 cascade initiated on plasma membrane                                   | 85   | 3.96E-05 | 0.001532 | PPP2R1A PPP2CA UBC MAP2K1                                                                                  |
| GO       | extracellular exosome                                                        | 2154 | 3.47E-07 | 0.001546 | PPP2CA KRT8 TFRC HIST2H2BE GIPC1 UBC CLTC PDIA3 CD2AP RAB5C RAB7A FLOT2 TUFM IQCB1 PPP2R1A YWHAG CDH1 ITCH |
| REACTOME | DNA Repair                                                                   | 291  | 4.56E-05 | 0.001651 | RPA2 RPA1 HIST2H2BE XRCC5 UBC SUMO1                                                                        |
| REACTOME | Recognition of DNA damage by PCNA-containing replication complex             | 31   | 4.58E-05 | 0.001651 | RPA2 RPA1 UBC                                                                                              |
| REACTOME | Cell Cycle                                                                   | 591  | 4.55E-05 | 0.001671 | RPA2 PPP2CA RPA1 HIST2H2BE UBC PPP2R1A SUMO1 YWHAG                                                         |
| GO       | membrane organization                                                        | 132  | 4.86E-07 | 0.001735 | CLTC CBL TFRC SH3KBP1 UBC YWHAG                                                                            |
| REACTOME | Termination of translesion DNA synthesis                                     | 32   | 5.04E-05 | 0.001789 | RPA2 RPA1 UBC                                                                                              |
| REACTOME | TRAF6 mediated induction of NFkB and MAP kinases upon TLR7/8 or 9 activation | 92   | 5.41E-05 | 0.001887 | PPP2R1A PPP2CA UBC MAP2K1                                                                                  |
| REACTOME | MyD88 dependent cascade initiated on endosome                                | 94   | 5.88E-05 | 0.001989 | PPP2R1A PPP2CA UBC MAP2K1                                                                                  |
| REACTOME | Toll Like Receptor 7/8 (TLR7/8) Cascade                                      | 94   | 5.88E-05 | 0.001989 | PPP2R1A PPP2CA UBC MAP2K1                                                                                  |
| REACTOME | Toll Like Receptor TLR6:TLR2 Cascade                                         | 95   | 6.13E-05 | 0.00201  | PPP2R1A PPP2CA UBC MAP2K1                                                                                  |
| REACTOME | MyD88:Mal cascade initiated on plasma membrane                               | 95   | 6.13E-05 | 0.00201  | PPP2R1A PPP2CA UBC MAP2K1                                                                                  |
| REACTOME | Membrane Trafficking                                                         | 618  | 6.24E-05 | 0.002014 | CLTC CBL TFRC RAB5C SH3KBP1 UBC RAB7A YWHAG                                                                |
| REACTOME | Regulation of TP53 Degradation                                               | 36   | 7.22E-05 | 0.002082 | PPP2R1A PPP2CA UBC                                                                                         |
| REACTOME | MyD88-independent TLR4 cascade                                               | 99   | 7.2E-05  | 0.002082 | PPP2R1A PPP2CA UBC MAP2K1                                                                                  |
| REACTOME | TRIF(TICAM1)-mediated TLR4 signaling                                         | 99   | 7.2E-05  | 0.002106 | PPP2R1A PPP2CA UBC MAP2K1                                                                                  |
| REACTOME | Toll Like Receptor 3 (TLR3) Cascade                                          | 98   | 6.92E-05 | 0.00211  | PPP2R1A PPP2CA UBC MAP2K1                                                                                  |
| REACTOME | Toll Like Receptor 2 (TLR2) Cascade                                          | 98   | 6.92E-05 | 0.00211  | PPP2R1A PPP2CA UBC MAP2K1                                                                                  |
| REACTOME | Cellular responses to external stimuli                                       | 462  | 7.12E-05 | 0.002135 | RPA2 HIST1H1A RPA1 HIST2H2BE MOV10 HMGA1 UBC                                                               |

|          |                                                                                    |      |          |          |                                                                              |
|----------|------------------------------------------------------------------------------------|------|----------|----------|------------------------------------------------------------------------------|
| REACTOME | Toll Like Receptor 9 (TLR9) Cascade                                                | 98   | 6.92E-05 | 0.00214  | PPP2R1A PPP2CA UBC MAP2K1                                                    |
| REACTOME | Toll Like Receptor TLR1:TLR2 Cascade                                               | 98   | 6.92E-05 | 0.002171 | PPP2R1A PPP2CA UBC MAP2K1                                                    |
| REACTOME | Regulation of TP53 Expression and Degradation                                      | 37   | 7.84E-05 | 0.002232 | PPP2R1A PPP2CA UBC                                                           |
| REACTOME | Fanconi Anemia Pathway                                                             | 38   | 8.5E-05  | 0.002388 | RPA2 RPA1 UBC                                                                |
| REACTOME | Translesion synthesis by Y family DNA polymerases bypasses lesions on DNA template | 39   | 9.19E-05 | 0.00255  | RPA2 RPA1 UBC                                                                |
| REACTOME | Vesicle-mediated transport                                                         | 655  | 9.36E-05 | 0.002563 | CLTC CBL TFRC RAB5C SH3KBP1 UBC RAB7A YWHAG                                  |
| GO       | flotillin complex                                                                  | 9    | 8.86E-07 | 0.002633 | CBL CDH1 FLOT2                                                               |
| REACTOME | PP2A-mediated dephosphorylation of key metabolic factors                           | 7    | 0.000103 | 0.002659 | PPP2R1A PPP2CA                                                               |
| REACTOME | 2-LTR circle formation                                                             | 7    | 0.000103 | 0.002659 | XRCC5 HMGA1                                                                  |
| REACTOME | Cell Cycle, Mitotic                                                                | 487  | 9.9E-05  | 0.002678 | RPA2 PPP2CA RPA1 HIST2H2BE UBC PPP2R1A YWHAG                                 |
| REACTOME | Downregulation of ERBB4 signaling                                                  | 7    | 0.000103 | 0.002691 | ITCH UBC                                                                     |
| REACTOME | Dual Incision in GG-NER                                                            | 41   | 0.000107 | 0.002721 | RPA2 RPA1 UBC                                                                |
| REACTOME | Cytokine Signaling in Immune system                                                | 664  | 0.000103 | 0.002724 | PPP2CA MAP2K1 CBL SOX2 PML UBC PPP2R1A SUMO1                                 |
| REACTOME | Nucleotide Excision Repair                                                         | 110  | 0.000108 | 0.00273  | SUMO1 RPA2 RPA1 UBC                                                          |
| REACTOME | Deactivation of the beta-catenin transactivating complex                           | 42   | 0.000115 | 0.002826 | SOX2 ASH2L UBC                                                               |
| REACTOME | Signaling by EGFR                                                                  | 42   | 0.000115 | 0.002826 | CBL SH3KBP1 UBC                                                              |
| REACTOME | Cyclin D associated events in G1                                                   | 43   | 0.000123 | 0.002966 | PPP2R1A PPP2CA UBC                                                           |
| REACTOME | G1 Phase                                                                           | 43   | 0.000123 | 0.002966 | PPP2R1A PPP2CA UBC                                                           |
| REACTOME | Diseases of signal transduction                                                    | 359  | 0.000145 | 0.003441 | PPP2CA MAP2K1 CBL UBC PPP2R1A KAT2A                                          |
| GO       | RNA binding                                                                        | 1415 | 1.53E-06 | 0.003908 | PDIA3 UBC TRIP6 CLTC TSR1 TFRC CAVIN1 XRCC5 SFPQ MOV10 TUFM SUMO1 NXF1 YWHAG |
| REACTOME | Signaling by NOTCH                                                                 | 123  | 0.000167 | 0.003928 | ITCH KAT2A MOV10 UBC                                                         |
| REACTOME | Integration of provirus                                                            | 9    | 0.000176 | 0.003977 | XRCC5 HMGA1                                                                  |
| REACTOME | InIA-mediated entry of Listeria monocytogenes into host cells                      | 9    | 0.000176 | 0.003977 | CDH1 UBC                                                                     |

|          |                                                                                                           |     |          |          |                                                                 |
|----------|-----------------------------------------------------------------------------------------------------------|-----|----------|----------|-----------------------------------------------------------------|
| REACTOME | PTK6 Regulates RTKs and Their Effectors AKT1 and DOK1                                                     | 9   | 0.000176 | 0.004019 | CBL UBC                                                         |
| REACTOME | Regulation of PTEN localization                                                                           | 9   | 0.000176 | 0.004062 | PML UBC                                                         |
| REACTOME | DNA Damage Bypass                                                                                         | 49  | 0.000182 | 0.004069 | RPA2 RPA1 UBC                                                   |
| REACTOME | Nonhomologous End-Joining (NHEJ)                                                                          | 50  | 0.000194 | 0.004254 | SUMO1 XRCC5 HIST2H2BE                                           |
| REACTOME | Toll Like Receptor 4 (TLR4) Cascade                                                                       | 128 | 0.000195 | 0.004254 | PPP2R1A PPP2CA UBC MAP2K1                                       |
| REACTOME | Initiation of Nuclear Envelope Reformation                                                                | 10  | 0.00022  | 0.004539 | PPP2R1A PPP2CA                                                  |
| REACTOME | Nuclear Envelope Reassembly                                                                               | 10  | 0.00022  | 0.004539 | PPP2R1A PPP2CA                                                  |
| REACTOME | Removal of the Flap Intermediate from the C-strand                                                        | 10  | 0.00022  | 0.004582 | RPA2 RPA1                                                       |
| REACTOME | MASTL Facilitates Mitotic Progression                                                                     | 10  | 0.00022  | 0.004627 | PPP2R1A PPP2CA                                                  |
| REACTOME | Signaling by Non-Receptor Tyrosine Kinases                                                                | 52  | 0.000218 | 0.004666 | CBL SFPQ UBC                                                    |
| REACTOME | Signaling by PTK6                                                                                         | 52  | 0.000218 | 0.004666 | CBL SFPQ UBC                                                    |
| REACTOME | Meiotic recombination                                                                                     | 53  | 0.00023  | 0.004705 | RPA2 RPA1 HIST2H2BE                                             |
| REACTOME | Processive synthesis on the C-strand of the telomere                                                      | 11  | 0.000269 | 0.005436 | RPA2 RPA1                                                       |
| REACTOME | Recruitment and ATM-mediated phosphorylation of repair and signaling proteins at DNA double strand breaks | 57  | 0.000286 | 0.005732 | SUMO1 HIST2H2BE UBC                                             |
| REACTOME | DNA Double Strand Break Response                                                                          | 58  | 0.000301 | 0.00598  | SUMO1 HIST2H2BE UBC                                             |
| REACTOME | DNA Damage/Telomere Stress Induced Senescence                                                             | 59  | 0.000317 | 0.006233 | HIST1H1A HIST2H2BE HMGA1                                        |
| REACTOME | HSF1 activation                                                                                           | 12  | 0.000322 | 0.006279 | RPA2 RPA1                                                       |
| REACTOME | Telomere Maintenance                                                                                      | 61  | 0.00035  | 0.006726 | RPA2 RPA1 HIST2H2BE                                             |
| REACTOME | MAPK family signaling cascades                                                                            | 272 | 0.000351 | 0.006726 | PPP2R1A PPP2CA UBC MOV10 MAP2K1                                 |
| REACTOME | RHO GTPase Effectors                                                                                      | 274 | 0.000363 | 0.006894 | PPP2R1A PPP2CA HIST2H2BE CDH1 YWHAG                             |
| GO       | regulation of transcription, DNA-templated                                                                | 898 | 3.51E-06 | 0.006957 | MOV10 PPP2CA TRIP6 CBL HMGA1 SOX2 PML SFPQ CAVIN1 ASH2L PPP2R1A |

|          |                                                                                       |      |          |          |                                                       |
|----------|---------------------------------------------------------------------------------------|------|----------|----------|-------------------------------------------------------|
| GO       | protein C-terminus binding                                                            | 184  | 3.38E-06 | 0.006957 | PPP2CA MAP2K1 PHB2 CD2AP XRCC5 SUMO1                  |
| REACTOME | ERKs are inactivated                                                                  | 13   | 0.00038  | 0.00709  | PPP2R1A PPP2CA                                        |
| REACTOME | Inhibition of replication initiation of damaged DNA by RB1/E2F1                       | 13   | 0.00038  | 0.00709  | PPP2R1A PPP2CA                                        |
| REACTOME | RUNX1 regulates genes involved in megakaryocyte differentiation and platelet function | 63   | 0.000385 | 0.007114 | ASH2L HIST2H2BE MOV10                                 |
| REACTOME | Truncations of AMER1 destabilize the destruction complex                              | 14   | 0.000443 | 0.007204 | PPP2R1A PPP2CA                                        |
| REACTOME | AMER1 mutants destabilize the destruction complex                                     | 14   | 0.000443 | 0.007204 | PPP2R1A PPP2CA                                        |
| REACTOME | Toll-Like Receptors Cascades                                                          | 154  | 0.000394 | 0.007226 | PPP2R1A PPP2CA UBC MAP2K1                             |
| REACTOME | Innate Immune System                                                                  | 1027 | 0.000399 | 0.007252 | PPP2CA MAP2K1 VAPA RAB5C XRCC5 UBC ITCH PPP2R1A RAB7A |
| REACTOME | Early Phase of HIV Life Cycle                                                         | 14   | 0.000443 | 0.007259 | XRCC5 HMGA1                                           |
| REACTOME | Gap-filling DNA repair synthesis and ligation in TC-NER                               | 64   | 0.000403 | 0.007265 | RPA2 RPA1 UBC                                         |
| REACTOME | AXIN mutants destabilize the destruction complex, activating WNT signaling            | 14   | 0.000443 | 0.007314 | PPP2R1A PPP2CA                                        |
| REACTOME | Mismatch repair (MMR) directed by MSH2:MSH6 (MutSalpha)                               | 14   | 0.000443 | 0.007371 | RPA2 RPA1                                             |
| REACTOME | truncated APC mutants destabilize the destruction complex                             | 14   | 0.000443 | 0.007428 | PPP2R1A PPP2CA                                        |
| REACTOME | Dual incision in TC-NER                                                               | 65   | 0.000422 | 0.00748  | RPA2 RPA1 UBC                                         |
| REACTOME | Costimulation by the CD28 family                                                      | 65   | 0.000422 | 0.00748  | TRIB3 PPP2R1A PPP2CA                                  |
| REACTOME | Mismatch repair (MMR) directed by MSH2:MSH3 (MutSbeta)                                | 14   | 0.000443 | 0.007486 | RPA2 RPA1                                             |
| REACTOME | Removal of the Flap Intermediate                                                      | 14   | 0.000443 | 0.007545 | RPA2 RPA1                                             |
| REACTOME | Signaling by Interleukins                                                             | 447  | 0.000469 | 0.007576 | PPP2CA MAP2K1 CBL SOX2 UBC PPP2R1A                    |

|          |                                                                                                      |     |          |          |                         |
|----------|------------------------------------------------------------------------------------------------------|-----|----------|----------|-------------------------|
| REACTOME | APC truncation mutants have impaired AXIN binding                                                    | 14  | 0.000443 | 0.007605 | PPP2R1A PPP2CA          |
| REACTOME | AXIN missense mutants destabilize the destruction complex                                            | 14  | 0.000443 | 0.007666 | PPP2R1A PPP2CA          |
| REACTOME | HDR through Homologous Recombination (HRR)                                                           | 66  | 0.000441 | 0.007727 | RPA2 RPA1 UBC           |
| REACTOME | Misspliced GSK3beta mutants stabilize beta-catenin                                                   | 15  | 0.00051  | 0.007775 | PPP2R1A PPP2CA          |
| REACTOME | Mismatch Repair                                                                                      | 15  | 0.00051  | 0.007775 | RPA2 RPA1               |
| REACTOME | T41 mutants of beta-catenin aren't phosphorylated                                                    | 15  | 0.00051  | 0.00783  | PPP2R1A PPP2CA          |
| REACTOME | SUMOylation of DNA damage response and repair proteins                                               | 70  | 0.000524 | 0.00788  | SUMO1 PML RPA1          |
| REACTOME | Apoptosis                                                                                            | 166 | 0.000523 | 0.00788  | HIST1H1A YWHAG CDH1 UBC |
| REACTOME | S45 mutants of beta-catenin aren't phosphorylated                                                    | 15  | 0.00051  | 0.007886 | PPP2R1A PPP2CA          |
| REACTOME | phosphorylation site mutants of CTNNB1 are not targeted to the proteasome by the destruction complex | 15  | 0.00051  | 0.007943 | PPP2R1A PPP2CA          |
| REACTOME | S33 mutants of beta-catenin aren't phosphorylated                                                    | 15  | 0.00051  | 0.008    | PPP2R1A PPP2CA          |
| REACTOME | S37 mutants of beta-catenin aren't phosphorylated                                                    | 15  | 0.00051  | 0.008059 | PPP2R1A PPP2CA          |
| REACTOME | Processive synthesis on the lagging strand                                                           | 15  | 0.00051  | 0.008118 | RPA2 RPA1               |
| REACTOME | Signaling by NOTCH1                                                                                  | 71  | 0.000547 | 0.008158 | ITCH KAT2A UBC          |
| REACTOME | Programmed Cell Death                                                                                | 169 | 0.00056  | 0.008294 | HIST1H1A YWHAG CDH1 UBC |
| REACTOME | Clathrin derived vesicle budding                                                                     | 72  | 0.00057  | 0.008327 | TFRC CLTC RAB5C         |
| REACTOME | trans-Golgi Network Vesicle Budding                                                                  | 72  | 0.00057  | 0.008327 | TFRC CLTC RAB5C         |
| REACTOME | Formation of Senescence-Associated Heterochromatin Foci (SAHF)                                       | 16  | 0.000582 | 0.0084   | HIST1H1A HMGA1          |

|          |                                                                  |     |          |          |                             |
|----------|------------------------------------------------------------------|-----|----------|----------|-----------------------------|
| REACTOME | MAP3K8 (TPL2)-dependent MAPK1/3 activation                       | 16  | 0.000582 | 0.0084   | UBC MAP2K1                  |
| REACTOME | Beta-catenin phosphorylation cascade                             | 17  | 0.000659 | 0.00932  | PPP2R1A PPP2CA              |
| REACTOME | Regulation of RUNX1 Expression and Activity                      | 17  | 0.000659 | 0.00932  | PML MOV10                   |
| REACTOME | Signaling by NTRK1 (TRKA)                                        | 76  | 0.000667 | 0.009374 | PPP2R1A PPP2CA CLTC         |
| REACTOME | Platelet sensitization by LDL                                    | 17  | 0.000659 | 0.009381 | PPP2R1A PPP2CA              |
| REACTOME | Signaling by MET                                                 | 77  | 0.000693 | 0.009676 | CBL SH3KBP1 UBC             |
| REACTOME | Transcription-Coupled Nucleotide Excision Repair (TC-NER)        | 78  | 0.00072  | 0.00992  | RPA2 RPA1 UBC               |
| REACTOME | RNA Polymerase I Transcription                                   | 78  | 0.00072  | 0.00992  | KAT2A HIST2H2BE CAVIN1      |
| REACTOME | Constitutive Signaling by Ligand-Responsive EGFR Cancer Variants | 18  | 0.00074  | 0.010011 | CBL UBC                     |
| REACTOME | Signaling by EGFR in Cancer                                      | 18  | 0.00074  | 0.010011 | CBL UBC                     |
| REACTOME | Signaling by Ligand-Responsive EGFR Variants in Cancer           | 18  | 0.00074  | 0.010074 | CBL UBC                     |
| REACTOME | Degradation of beta-catenin by the destruction complex           | 82  | 0.000833 | 0.01119  | PPP2R1A PPP2CA UBC          |
| KEGG     | OOCYTE_MEIOSIS                                                   | 113 | 0.00012  | 0.011196 | PPP2R1A PPP2CA YWHAG MAP2K1 |
| REACTOME | Meiosis                                                          | 83  | 0.000862 | 0.01152  | RPA2 RPA1 HIST2H2BE         |
| REACTOME | G2/M Transition                                                  | 191 | 0.000884 | 0.011741 | PPP2R1A PPP2CA YWHAG UBC    |
| REACTOME | Hedgehog 'on' state                                              | 85  | 0.000924 | 0.011764 | ITCH PTCH1 UBC              |
| REACTOME | DNA Replication Pre-Initiation                                   | 85  | 0.000924 | 0.011764 | RPA2 RPA1 UBC               |
| REACTOME | Regulation of PLK1 Activity at G2/M Transition                   | 85  | 0.000924 | 0.011834 | PPP2R1A YWHAG UBC           |
| REACTOME | M/G1 Transition                                                  | 85  | 0.000924 | 0.011904 | RPA2 RPA1 UBC               |
| REACTOME | Mitotic G2-G2/M phases                                           | 193 | 0.000919 | 0.011975 | PPP2R1A PPP2CA YWHAG UBC    |
| REACTOME | Lagging Strand Synthesis                                         | 20  | 0.000917 | 0.011984 | RPA2 RPA1                   |
| REACTOME | CTLA4 inhibitory signaling                                       | 20  | 0.000917 | 0.012021 | PPP2R1A PPP2CA              |
| REACTOME | PCNA-Dependent Long Patch Base Excision Repair                   | 21  | 0.001012 | 0.012728 | RPA2 RPA1                   |
| REACTOME | Regulation of signaling by CBL                                   | 21  | 0.001012 | 0.012728 | CBL UBC                     |
| REACTOME | Chromosome Maintenance                                           | 88  | 0.001022 | 0.012783 | RPA2 RPA1 HIST2H2BE         |

|          |                                                                              |      |          |          |                                                                                                                             |
|----------|------------------------------------------------------------------------------|------|----------|----------|-----------------------------------------------------------------------------------------------------------------------------|
| REACTOME | Negative regulation of the PI3K/AKT network                                  | 89   | 0.001056 | 0.013057 | TRIB3 PPP2R1A PPP2CA                                                                                                        |
| REACTOME | M Phase                                                                      | 347  | 0.001056 | 0.013057 | PPP2R1A PPP2CA YWHAG<br>HIST2H2BE UBC                                                                                       |
| REACTOME | Oxidative Stress Induced Senescence                                          | 90   | 0.001091 | 0.01341  | HIST2H2BE MOV10 UBC                                                                                                         |
| REACTOME | ERK/MAPK targets                                                             | 22   | 0.001111 | 0.013509 | PPP2R1A PPP2CA                                                                                                              |
| REACTOME | E2F mediated regulation of DNA replication                                   | 22   | 0.001111 | 0.013509 | PPP2R1A PPP2CA                                                                                                              |
| REACTOME | Signaling by NTRKs                                                           | 92   | 0.001162 | 0.013972 | PPP2R1A PPP2CA CLTC                                                                                                         |
| REACTOME | Regulation of TP53 Activity through Phosphorylation                          | 92   | 0.001162 | 0.013972 | RPA2 RPA1 UBC                                                                                                               |
| REACTOME | DARPP-32 events                                                              | 24   | 0.001324 | 0.015655 | PPP2R1A PPP2CA                                                                                                              |
| REACTOME | Telomere C-strand (Lagging Strand) Synthesis                                 | 24   | 0.001324 | 0.015655 | RPA2 RPA1                                                                                                                   |
| REACTOME | Anchoring of the basal body to the plasma membrane                           | 96   | 0.001314 | 0.01571  | IQCB1 PPP2R1A YWHAG                                                                                                         |
| REACTOME | RUNX1 regulates transcription of genes involved in differentiation of HSCs   | 97   | 0.001354 | 0.015922 | ITCH HIST2H2BE UBC                                                                                                          |
| REACTOME | Resolution of AP sites via the multiple-nucleotide patch replacement pathway | 25   | 0.001437 | 0.016629 | RPA2 RPA1                                                                                                                   |
| REACTOME | Cyclin A/B1/B2 associated events during G2/M transition                      | 25   | 0.001437 | 0.016629 | PPP2R1A PPP2CA                                                                                                              |
| REACTOME | Nuclear Events (kinase and transcription factor activation)                  | 25   | 0.001437 | 0.016718 | PPP2R1A PPP2CA                                                                                                              |
| REACTOME | Mitotic Prophase                                                             | 100  | 0.001478 | 0.017011 | PPP2R1A PPP2CA HIST2H2BE                                                                                                    |
| REACTOME | Calnexin/calreticulin cycle                                                  | 26   | 0.001554 | 0.017798 | PDIA3 UBC                                                                                                                   |
| GO       | error-prone translesion synthesis                                            | 21   | 1.38E-05 | 0.018883 | RPA2 RPA1 UBC                                                                                                               |
| GO       | negative regulation of DNA binding transcription factor activity             | 65   | 1.37E-05 | 0.018883 | PHB2 SUMO1 NROB2 PTCH1                                                                                                      |
| GO       | protein localization to chromosome                                           | 3    | 1.48E-05 | 0.018896 | RPA2 RPA1                                                                                                                   |
| GO       | cytosol                                                                      | 4995 | 1.14E-05 | 0.019158 | KRT8 CLTC HMGA1 PML IQCB1<br>PPP2R1A GIPC1 HIST2H2BE LATS1<br>PPP2CA TRIP6 CBL TSR1 TRIB3 ITCH<br>SH3KBP1 CAVIN1 NXF1 RAB7A |



|          |                                                                                |      |          |          |                                                                                                            |
|----------|--------------------------------------------------------------------------------|------|----------|----------|------------------------------------------------------------------------------------------------------------|
|          |                                                                                |      |          |          | MAP2K1 MOV10 SOX2 XRCC5 UBC YWHAG                                                                          |
| GO       | error-free translesion synthesis                                               | 20   | 1.18E-05 | 0.019158 | RPA2 RPA1 UBC                                                                                              |
| REACTOME | RAF/MAP kinase cascade                                                         | 228  | 0.001699 | 0.019353 | PPP2R1A PPP2CA UBC MAP2K1                                                                                  |
| REACTOME | SUMO E3 ligases SUMOylate target proteins                                      | 106  | 0.001747 | 0.019789 | SUMO1 PML RPA1                                                                                             |
| REACTOME | Developmental Biology                                                          | 1023 | 0.001816 | 0.020472 | KRT8 MAP2K1 CLTC HIST2H2BE SOX2 SH3KBP1 UBC ASH2L                                                          |
| REACTOME | Reproduction                                                                   | 108  | 0.001843 | 0.020554 | RPA2 RPA1 HIST2H2BE                                                                                        |
| REACTOME | MAPK1/MAPK3 signaling                                                          | 233  | 0.001839 | 0.020554 | PPP2R1A PPP2CA UBC MAP2K1                                                                                  |
| REACTOME | Signaling by Rho GTPases                                                       | 402  | 0.002019 | 0.022405 | PPP2R1A PPP2CA HIST2H2BE CDH1 YWHAG                                                                        |
| REACTOME | SUMOylation                                                                    | 112  | 0.002044 | 0.022456 | SUMO1 PML RPA1                                                                                             |
| REACTOME | Hedgehog 'off' state                                                           | 112  | 0.002044 | 0.022456 | ITCH PTCH1 UBC                                                                                             |
| REACTOME | Extension of Telomeres                                                         | 30   | 0.002069 | 0.02261  | RPA2 RPA1                                                                                                  |
| REACTOME | Signaling by the B Cell Receptor (BCR)                                         | 113  | 0.002097 | 0.022801 | CBL SH3KBP1 UBC                                                                                            |
| REACTOME | Disassembly of the destruction complex and recruitment of AXIN to the membrane | 31   | 0.002208 | 0.023425 | PPP2R1A PPP2CA                                                                                             |
| REACTOME | Pre-NOTCH Transcription and Translation                                        | 31   | 0.002208 | 0.023425 | KAT2A MOV10                                                                                                |
| REACTOME | MAPK targets/ Nuclear events mediated by MAP kinases                           | 31   | 0.002208 | 0.02354  | PPP2R1A PPP2CA                                                                                             |
| REACTOME | TGF-beta receptor signaling activates SMADs                                    | 31   | 0.002208 | 0.023657 | CBL UBC                                                                                                    |
| REACTOME | Activated NOTCH1 Transmits Signal to the Nucleus                               | 31   | 0.002208 | 0.023774 | ITCH UBC                                                                                                   |
| GO       | nucleoplasm                                                                    | 3162 | 2.14E-05 | 0.023872 | RPA2 KRT8 RPA1 TSR1 HIST2H2BE HMGA1 SOX2 ITCH PML XRCC5 SFPQ CAVIN1 NR0B2 UBC IQCB1 ASH2L KAT2A SUMO1 NXF1 |
| GO       | nucleotide-excision repair, DNA gap filling                                    | 24   | 2.08E-05 | 0.023872 | RPA2 RPA1 UBC                                                                                              |
| REACTOME | DNA strand elongation                                                          | 32   | 0.002352 | 0.024829 | RPA2 RPA1                                                                                                  |
| BIOCARTA | CHREBP2_PATHWAY                                                                | 42   | 0.000115 | 0.024937 | PPP2R1A PPP2CA YWHAG                                                                                       |
| REACTOME | Synthesis of DNA                                                               | 119  | 0.002429 | 0.025518 | RPA2 RPA1 UBC                                                                                              |
| REACTOME | Activation of the pre-replicative complex                                      | 33   | 0.0025   | 0.025765 | RPA2 RPA1                                                                                                  |
| REACTOME | Oncogene Induced Senescence                                                    | 33   | 0.0025   | 0.025765 | MOV10 UBC                                                                                                  |

|          |                                                                                    |      |          |          |                                                      |
|----------|------------------------------------------------------------------------------------|------|----------|----------|------------------------------------------------------|
| REACTOME | Antigen activates B Cell Receptor (BCR) leading to generation of second messengers | 33   | 0.0025   | 0.025888 | CBL SH3KBP1                                          |
| REACTOME | Post-translational protein modification                                            | 1331 | 0.002495 | 0.026013 | PDIA3 RPA1 HIST2H2BE RAB5C PML UBC KAT2A SUMO1 RAB7A |
| REACTOME | Negative regulators of DDX58/IFIH1 signaling                                       | 34   | 0.002653 | 0.027078 | ITCH UBC                                             |
| REACTOME | Signaling by WNT in cancer                                                         | 34   | 0.002653 | 0.027078 | PPP2R1A PPP2CA                                       |
| REACTOME | NOD1/2 Signaling Pathway                                                           | 35   | 0.00281  | 0.02841  | ITCH UBC                                             |
| REACTOME | N-glycan trimming in the ER and Calnexin/Calreticulin cycle                        | 35   | 0.00281  | 0.02841  | PDIA3 UBC                                            |
| GO       | second-messenger-mediated signaling                                                | 4    | 2.96E-05 | 0.029351 | PPP2R1A PPP2CA                                       |
| GO       | PML body organization                                                              | 4    | 2.96E-05 | 0.029351 | PML SUMO1                                            |
| REACTOME | DNA Replication                                                                    | 127  | 0.002921 | 0.029398 | RPA2 RPA1 UBC                                        |
| BIOCARTA | SPRY_PATHWAY                                                                       | 18   | 0.00074  | 0.029878 | CBL MAP2K1                                           |
| BIOCARTA | TGFB_PATHWAY                                                                       | 19   | 0.000826 | 0.029878 | CDH1 MAP2K1                                          |
| REACTOME | HDR through Single Strand Annealing (SSA)                                          | 37   | 0.003136 | 0.030986 | RPA2 RPA1                                            |
| REACTOME | Base Excision Repair                                                               | 37   | 0.003136 | 0.030986 | RPA2 RPA1                                            |
| REACTOME | Resolution of Abasic Sites (AP sites)                                              | 37   | 0.003136 | 0.031128 | RPA2 RPA1                                            |
| REACTOME | Activation of ATR in response to replication stress                                | 37   | 0.003136 | 0.031271 | RPA2 RPA1                                            |
| BIOCARTA | TEL_PATHWAY                                                                        | 18   | 0.00074  | 0.032126 | PPP2CA XRCC5                                         |
| KEGG     | LONG_TERM_DEPRESSION                                                               | 70   | 0.000524 | 0.032511 | PPP2R1A PPP2CA MAP2K1                                |
| REACTOME | Presynaptic phase of homologous DNA pairing and strand exchange                    | 39   | 0.003479 | 0.034221 | RPA2 RPA1                                            |
| GO       | nucleotide-excision repair, preincision complex assembly                           | 29   | 3.73E-05 | 0.035052 | RPA2 RPA1 UBC                                        |
| REACTOME | PTEN Regulation                                                                    | 138  | 0.003691 | 0.036137 | PML MOV10 UBC                                        |
| KEGG     | PATHWAYS_IN_CANCER                                                                 | 325  | 0.000788 | 0.036635 | CBL PML CDH1 PTCH1 MAP2K1                            |
| REACTOME | Signaling by ERBB4                                                                 | 41   | 0.003839 | 0.037421 | ITCH UBC                                             |
| REACTOME | Homologous DNA Pairing and Strand Exchange                                         | 42   | 0.004025 | 0.03906  | RPA2 RPA1                                            |
| REACTOME | Beta-catenin independent WNT signaling                                             | 143  | 0.004078 | 0.039392 | CLTC MOV10 UBC                                       |
| BIOCARTA | PML_PATHWAY                                                                        | 17   | 0.000659 | 0.040157 | PML SUMO1                                            |

|          |                                                          |     |          |          |                 |
|----------|----------------------------------------------------------|-----|----------|----------|-----------------|
| BIOCARTA | CBL_PATHWAY                                              | 13  | 0.00038  | 0.041239 | CBL SH3KBP1     |
| REACTOME | TBC/RABGAPs                                              | 44  | 0.00441  | 0.042226 | RAB5C RAB7A     |
| REACTOME | HIV Life Cycle                                           | 147 | 0.004404 | 0.042226 | XRCC5 HMGA1 UBC |
| REACTOME | Entry of Influenza Virion into Host Cell via Endocytosis | 2   | 0.004495 | 0.042664 | CLTC            |
| REACTOME | Signaling by Hedgehog                                    | 148 | 0.004488 | 0.042664 | ITCH PTCH1 UBC  |
| REACTOME | NOTCH1 Intracellular Domain Regulates Transcription      | 45  | 0.004608 | 0.043549 | KAT2A UBC       |
| KEGG     | MISMATCH_REPAIR                                          | 23  | 0.001215 | 0.045209 | RPA2 RPA1       |
| REACTOME | Interleukin-3, 5 and GM-CSF signaling                    | 47  | 0.005018 | 0.047006 | CBL UBC         |
| REACTOME | Pre-NOTCH Expression and Processing                      | 47  | 0.005018 | 0.047006 | KAT2A MOV10     |
| REACTOME | Signaling by NOTCH3                                      | 48  | 0.005228 | 0.048769 | KAT2A UBC       |

**Table S3: Gene set enrichment analyses of genes outside of the PH and Fibrosis Networks interacting with miR-130/301 target genes and factors associated with heritable PAH. Pathways are listed in order of lowest to highest FDR p-value (Q).**

| Source   | Annotation                                   | Size | P        | Q        | Genes                                                                                                                                                                                                                                                                        |
|----------|----------------------------------------------|------|----------|----------|------------------------------------------------------------------------------------------------------------------------------------------------------------------------------------------------------------------------------------------------------------------------------|
| GO       | protein binding                              | 9409 | 3.78E-11 | 6.75E-07 | KRT8 RPA1 CLTC VAPA HMGA1<br>PML SFPQ TUFM IQCB1 PPP2R1A<br>RPA2 PTCH1 GIPC1 CD2AP FLOT2<br>LATS1 ASH2L CDH1 PPP2CA<br>HIST1H1A TRIP6 CBL TFRC TRIB3<br>RAB5C SH3KBP1 CAVIN1 NROB2<br>KAT2A SUMO1 NXF1 RAB7A ITCH<br>PDIA3 LMO4 MAP2K1 PHB2<br>MOV10 SOX2 XRCC5 UBC<br>YWHAG |
| REACTOME | Gene expression (Transcription)              | 1330 | 1.05E-07 | 4.54E-05 | RPA2 PPP2CA RPA1 UBC<br>HIST2H2BE CAVIN1 PML MOV10<br>NROB2 ASH2L ITCH PPP2R1A<br>KAT2A SUMO1 YWHAG                                                                                                                                                                          |
| REACTOME | Listeria monocytogenes entry into host cells | 19   | 8.45E-08 | 4.54E-05 | CBL SH3KBP1 CDH1 UBC                                                                                                                                                                                                                                                         |
| REACTOME | Immune System                                | 1945 | 7.35E-08 | 4.57E-05 | PDIA3 PPP2CA MAP2K1 SH3KBP1<br>CBL CLTC VAPA TRIB3 RAB5C<br>PML XRCC5 RAB7A UBC ITCH<br>PPP2R1A SOX2 SUMO1 CDH1                                                                                                                                                              |
| REACTOME | Spry regulation of FGF signaling             | 14   | 2.2E-08  | 4.76E-05 | PPP2R1A PPP2CA CBL UBC                                                                                                                                                                                                                                                       |
| REACTOME | Cell Cycle Checkpoints                       | 270  | 1.39E-07 | 5.02E-05 | RPA2 PPP2CA RPA1 HIST2H2BE<br>UBC PPP2R1A SUMO1 YWHAG                                                                                                                                                                                                                        |
| REACTOME | Signal Transduction                          | 2598 | 2.13E-07 | 5.11E-05 | SOX2 PPP2CA PTCH1 MAP2K1<br>CLTC CBL UBC HIST2H2BE<br>SH3KBP1 MOV10 TRIB3 ITCH<br>PML SFPQ ASH2L LATS1<br>PPP2R1A KAT2A CDH1 YWHAG                                                                                                                                           |
| REACTOME | RNA Polymerase II Transcription              | 1196 | 2.01E-07 | 5.11E-05 | RPA2 PPP2CA RPA1 UBC<br>HIST2H2BE MOV10 PML NROB2<br>ASH2L ITCH PPP2R1A KAT2A<br>SUMO1 YWHAG                                                                                                                                                                                 |
| REACTOME | Generic Transcription Pathway                | 1074 | 5.32E-08 | 5.3E-05  | RPA2 PPP2CA RPA1 UBC<br>HIST2H2BE MOV10 PML NROB2<br>ASH2L ITCH PPP2R1A KAT2A<br>SUMO1 YWHAG                                                                                                                                                                                 |
| REACTOME | Negative regulation of FGFR3 signaling       | 23   | 1.92E-07 | 5.44E-05 | PPP2R1A PPP2CA CBL UBC                                                                                                                                                                                                                                                       |
| REACTOME | Signaling by WNT                             | 294  | 2.67E-07 | 5.77E-05 | PPP2CA HIST2H2BE UBC CLTC<br>MOV10 SOX2 ASH2L PPP2R1A                                                                                                                                                                                                                        |
| REACTOME | Negative regulation of FGFR1 signaling       | 26   | 3.22E-07 | 6.34E-05 | PPP2R1A PPP2CA CBL UBC                                                                                                                                                                                                                                                       |

|          |                                                                            |     |          |          |                                                                 |
|----------|----------------------------------------------------------------------------|-----|----------|----------|-----------------------------------------------------------------|
| REACTOME | Negative regulation of FGFR4 signaling                                     | 27  | 3.78E-07 | 6.81E-05 | PPP2R1A PPP2CA CBL UBC                                          |
| REACTOME | Negative regulation of FGFR2 signaling                                     | 28  | 4.4E-07  | 7.33E-05 | PPP2R1A PPP2CA CBL UBC                                          |
| REACTOME | Adaptive Immune System                                                     | 743 | 5.53E-07 | 8.54E-05 | PPP2CA CBL CLTC PDIA3 TRIB3 SH3KBP1 RAB7A UBC ITCH PPP2R1A CDH1 |
| REACTOME | Clathrin-mediated endocytosis                                              | 138 | 6.32E-07 | 9.11E-05 | CLTC CBL TFRC RAB5C SH3KBP1 UBC                                 |
| REACTOME | G2/M DNA damage checkpoint                                                 | 76  | 7.52E-07 | 0.000102 | SUMO1 RPA2 YWHAG RPA1 HIST2H2BE                                 |
| REACTOME | Processing of DNA double-strand break ends                                 | 79  | 9.13E-07 | 0.000104 | SUMO1 RPA2 UBC RPA1 HIST2H2BE                                   |
| REACTOME | DNA Double-Strand Break Repair                                             | 146 | 8.79E-07 | 0.000104 | RPA2 RPA1 HIST2H2BE XRCC5 UBC SUMO1                             |
| REACTOME | Signaling by FGFR3                                                         | 33  | 8.72E-07 | 0.000106 | PPP2R1A PPP2CA CBL UBC                                          |
| REACTOME | G2/M Checkpoints                                                           | 149 | 9.91E-07 | 0.000107 | RPA2 RPA1 HIST2H2BE UBC SUMO1 YWHAG                             |
| REACTOME | Transcriptional Regulation by TP53                                         | 359 | 1.2E-06  | 0.000123 | RPA2 PPP2CA RPA1 MOV10 PML UBC PPP2R1A YWHAG                    |
| REACTOME | Signaling by FGFR4                                                         | 36  | 1.25E-06 | 0.000123 | PPP2R1A PPP2CA CBL UBC                                          |
| REACTOME | Infectious disease                                                         | 368 | 1.45E-06 | 0.000135 | MAP2K1 CBL CLTC HMGA1 SH3KBP1 XRCC5 UBC CDH1                    |
| REACTOME | Regulation of TP53 Activity                                                | 160 | 1.5E-06  | 0.000135 | RPA2 PPP2CA RPA1 PML UBC PPP2R1A                                |
| REACTOME | Negative regulation of MAPK pathway                                        | 40  | 1.93E-06 | 0.000167 | PPP2R1A PPP2CA UBC MAP2K1                                       |
| REACTOME | Signaling by FGFR1                                                         | 42  | 2.35E-06 | 0.000196 | PPP2R1A PPP2CA CBL UBC                                          |
| REACTOME | Cargo recognition for clathrin-mediated endocytosis                        | 98  | 2.67E-06 | 0.000206 | TFRC CBL CLTC SH3KBP1 UBC                                       |
| REACTOME | Formation of Incision Complex in GG-NER                                    | 43  | 2.59E-06 | 0.000206 | SUMO1 RPA2 RPA1 UBC                                             |
| REACTOME | InIB-mediated entry of Listeria monocytogenes into host cell               | 14  | 3.81E-06 | 0.000284 | CBL SH3KBP1 UBC                                                 |
| REACTOME | Signaling by Receptor Tyrosine Kinases                                     | 433 | 4.83E-06 | 0.000349 | PPP2CA CBL CLTC TRIB3 SH3KBP1 UBC ITCH PPP2R1A                  |
| REACTOME | HDR through Homologous Recombination (HR) or Single Strand Annealing (SSA) | 112 | 5.14E-06 | 0.000359 | SUMO1 RPA2 UBC RPA1 HIST2H2BE                                   |
| REACTOME | TCF dependent signaling in response to WNT                                 | 199 | 5.31E-06 | 0.000359 | ASH2L PPP2CA HIST2H2BE SOX2 UBC PPP2R1A                         |
| REACTOME | Translesion synthesis by REV1                                              | 16  | 5.84E-06 | 0.000372 | RPA2 RPA1 UBC                                                   |

|          |                                                         |      |          |          |                                                                         |
|----------|---------------------------------------------------------|------|----------|----------|-------------------------------------------------------------------------|
| REACTOME | Transcriptional regulation by RUNX1                     | 202  | 5.78E-06 | 0.000372 | HIST2H2BE MOV10 PML UBC<br>ITCH ASH2L                                   |
| REACTOME | Homology Directed Repair                                | 118  | 6.64E-06 | 0.000411 | SUMO1 RPA2 UBC RPA1<br>HIST2H2BE                                        |
| REACTOME | Translesion synthesis by POLI                           | 17   | 7.08E-06 | 0.000414 | RPA2 RPA1 UBC                                                           |
| REACTOME | Translesion synthesis by POLK                           | 17   | 7.08E-06 | 0.000414 | RPA2 RPA1 UBC                                                           |
| KEGG     | ENDOCYTOSIS                                             | 181  | 3.07E-06 | 0.000571 | CLTC CBL TFRC RAB5C SH3KBP1<br>ITCH                                     |
| REACTOME | Translesion Synthesis by POLH                           | 19   | 1.01E-05 | 0.000573 | RPA2 RPA1 UBC                                                           |
| REACTOME | G1/S Transition                                         | 130  | 1.07E-05 | 0.000591 | PPP2R1A PPP2CA UBC RPA1<br>RPA2                                         |
| REACTOME | Disease                                                 | 1017 | 1.15E-05 | 0.000621 | PPP2CA MAP2K1 CBL CLTC<br>HMGA1 SH3KBP1 XRCC5 UBC<br>PPP2R1A KAT2A CDH1 |
| REACTOME | Negative regulation of MET activity                     | 20   | 1.18E-05 | 0.000623 | CBL SH3KBP1 UBC                                                         |
| REACTOME | MAP kinase activation                                   | 63   | 1.21E-05 | 0.000623 | PPP2R1A PPP2CA UBC MAP2K1                                               |
| REACTOME | Signaling by FGFR2                                      | 66   | 1.46E-05 | 0.000732 | PPP2R1A PPP2CA CBL UBC                                                  |
| REACTOME | PIP3 activates AKT signaling                            | 240  | 1.54E-05 | 0.00076  | PPP2CA MOV10 TRIB3 PML UBC<br>PPP2R1A                                   |
| REACTOME | Interleukin-17 signaling                                | 71   | 1.95E-05 | 0.000916 | PPP2R1A PPP2CA UBC MAP2K1                                               |
| REACTOME | Mitotic G1-G1/S phases                                  | 147  | 1.93E-05 | 0.000916 | PPP2R1A PPP2CA UBC RPA1<br>RPA2                                         |
| REACTOME | EGFR downregulation                                     | 24   | 2.08E-05 | 0.00094  | CBL SH3KBP1 UBC                                                         |
| REACTOME | RAF activation                                          | 24   | 2.08E-05 | 0.00094  | PPP2R1A PPP2CA MAP2K1                                                   |
| REACTOME | Cellular responses to stress                            | 386  | 2.28E-05 | 0.001006 | RPA2 HIST1H1A RPA1<br>HIST2H2BE MOV10 HMGA1 UBC                         |
| REACTOME | Gap-filling DNA repair synthesis and ligation in GG-NER | 25   | 2.36E-05 | 0.001023 | RPA2 RPA1 UBC                                                           |
| REACTOME | Signaling by FGFR                                       | 77   | 2.68E-05 | 0.001139 | PPP2R1A PPP2CA CBL UBC                                                  |
| REACTOME | Cellular Senescence                                     | 160  | 2.9E-05  | 0.001208 | HIST1H1A HIST2H2BE MOV10<br>HMGA1 UBC                                   |
| REACTOME | Intracellular signaling by second messengers            | 271  | 3.06E-05 | 0.00125  | PPP2CA MOV10 TRIB3 PML UBC<br>PPP2R1A                                   |
| GO       | focal adhesion                                          | 402  | 2.29E-07 | 0.001361 | PDIA3 TRIP6 MAP2K1 CBL CLTC<br>HMGA1 SH3KBP1 FLOT2 YWHAG                |
| GO       | endocytic vesicle                                       | 59   | 2.1E-07  | 0.001361 | SH3KBP1 RAB5C GIPC1 FLOT2<br>CD2AP                                      |
| REACTOME | Toll Like Receptor 5 (TLR5) Cascade                     | 85   | 3.96E-05 | 0.001505 | PPP2R1A PPP2CA UBC MAP2K1                                               |
| REACTOME | Toll Like Receptor 10 (TLR10) Cascade                   | 85   | 3.96E-05 | 0.001505 | PPP2R1A PPP2CA UBC MAP2K1                                               |

|          |                                                                              |      |          |          |                                                                                                            |
|----------|------------------------------------------------------------------------------|------|----------|----------|------------------------------------------------------------------------------------------------------------|
| REACTOME | Global Genome Nucleotide Excision Repair (GG-NER)                            | 84   | 3.78E-05 | 0.001516 | SUMO1 RPA2 RPA1 UBC                                                                                        |
| REACTOME | MyD88 cascade initiated on plasma membrane                                   | 85   | 3.96E-05 | 0.001532 | PPP2R1A PPP2CA UBC MAP2K1                                                                                  |
| GO       | extracellular exosome                                                        | 2154 | 3.47E-07 | 0.001546 | PPP2CA KRT8 TFRC HIST2H2BE GIPC1 UBC CLTC PDIA3 CD2AP RAB5C RAB7A FLOT2 TUFM IQCB1 PPP2R1A YWHAG CDH1 ITCH |
| REACTOME | DNA Repair                                                                   | 291  | 4.56E-05 | 0.001651 | RPA2 RPA1 HIST2H2BE XRCC5 UBC SUMO1                                                                        |
| REACTOME | Recognition of DNA damage by PCNA-containing replication complex             | 31   | 4.58E-05 | 0.001651 | RPA2 RPA1 UBC                                                                                              |
| REACTOME | Cell Cycle                                                                   | 591  | 4.55E-05 | 0.001671 | RPA2 PPP2CA RPA1 HIST2H2BE UBC PPP2R1A SUMO1 YWHAG                                                         |
| GO       | membrane organization                                                        | 132  | 4.86E-07 | 0.001735 | CLTC CBL TFRC SH3KBP1 UBC YWHAG                                                                            |
| REACTOME | Termination of translesion DNA synthesis                                     | 32   | 5.04E-05 | 0.001789 | RPA2 RPA1 UBC                                                                                              |
| REACTOME | TRAF6 mediated induction of NFkB and MAP kinases upon TLR7/8 or 9 activation | 92   | 5.41E-05 | 0.001887 | PPP2R1A PPP2CA UBC MAP2K1                                                                                  |
| REACTOME | MyD88 dependent cascade initiated on endosome                                | 94   | 5.88E-05 | 0.001989 | PPP2R1A PPP2CA UBC MAP2K1                                                                                  |
| REACTOME | Toll Like Receptor 7/8 (TLR7/8) Cascade                                      | 94   | 5.88E-05 | 0.001989 | PPP2R1A PPP2CA UBC MAP2K1                                                                                  |
| REACTOME | Toll Like Receptor TLR6:TLR2 Cascade                                         | 95   | 6.13E-05 | 0.00201  | PPP2R1A PPP2CA UBC MAP2K1                                                                                  |
| REACTOME | MyD88:Mal cascade initiated on plasma membrane                               | 95   | 6.13E-05 | 0.00201  | PPP2R1A PPP2CA UBC MAP2K1                                                                                  |
| REACTOME | Membrane Trafficking                                                         | 618  | 6.24E-05 | 0.002014 | CLTC CBL TFRC RAB5C SH3KBP1 UBC RAB7A YWHAG                                                                |
| REACTOME | Regulation of TP53 Degradation                                               | 36   | 7.22E-05 | 0.002082 | PPP2R1A PPP2CA UBC                                                                                         |
| REACTOME | MyD88-independent TLR4 cascade                                               | 99   | 7.2E-05  | 0.002082 | PPP2R1A PPP2CA UBC MAP2K1                                                                                  |
| REACTOME | TRIF(TICAM1)-mediated TLR4 signaling                                         | 99   | 7.2E-05  | 0.002106 | PPP2R1A PPP2CA UBC MAP2K1                                                                                  |
| REACTOME | Toll Like Receptor 3 (TLR3) Cascade                                          | 98   | 6.92E-05 | 0.00211  | PPP2R1A PPP2CA UBC MAP2K1                                                                                  |

|          |                                                                                    |      |          |          |                                                                              |
|----------|------------------------------------------------------------------------------------|------|----------|----------|------------------------------------------------------------------------------|
| REACTOME | Toll Like Receptor 2 (TLR2) Cascade                                                | 98   | 6.92E-05 | 0.00211  | PPP2R1A PPP2CA UBC MAP2K1                                                    |
| REACTOME | Cellular responses to external stimuli                                             | 462  | 7.12E-05 | 0.002135 | RPA2 HIST1H1A RPA1 HIST2H2BE MOV10 HMGA1 UBC                                 |
| REACTOME | Toll Like Receptor 9 (TLR9) Cascade                                                | 98   | 6.92E-05 | 0.00214  | PPP2R1A PPP2CA UBC MAP2K1                                                    |
| REACTOME | Toll Like Receptor TLR1:TLR2 Cascade                                               | 98   | 6.92E-05 | 0.002171 | PPP2R1A PPP2CA UBC MAP2K1                                                    |
| REACTOME | Regulation of TP53 Expression and Degradation                                      | 37   | 7.84E-05 | 0.002232 | PPP2R1A PPP2CA UBC                                                           |
| REACTOME | Fanconi Anemia Pathway                                                             | 38   | 8.5E-05  | 0.002388 | RPA2 RPA1 UBC                                                                |
| REACTOME | Translesion synthesis by Y family DNA polymerases bypasses lesions on DNA template | 39   | 9.19E-05 | 0.00255  | RPA2 RPA1 UBC                                                                |
| REACTOME | Vesicle-mediated transport                                                         | 655  | 9.36E-05 | 0.002563 | CLTC CBL TFRC RAB5C SH3KBP1 UBC RAB7A YWHAG                                  |
| GO       | flotillin complex                                                                  | 9    | 8.86E-07 | 0.002633 | CBL CDH1 FLOT2                                                               |
| REACTOME | PP2A-mediated dephosphorylation of key metabolic factors                           | 7    | 0.000103 | 0.002659 | PPP2R1A PPP2CA                                                               |
| REACTOME | 2-LTR circle formation                                                             | 7    | 0.000103 | 0.002659 | XRCC5 HMGA1                                                                  |
| REACTOME | Cell Cycle, Mitotic                                                                | 487  | 9.9E-05  | 0.002678 | RPA2 PPP2CA RPA1 HIST2H2BE UBC PPP2R1A YWHAG                                 |
| REACTOME | Downregulation of ERBB4 signaling                                                  | 7    | 0.000103 | 0.002691 | ITCH UBC                                                                     |
| REACTOME | Dual Incision in GG-NER                                                            | 41   | 0.000107 | 0.002721 | RPA2 RPA1 UBC                                                                |
| REACTOME | Cytokine Signaling in Immune system                                                | 664  | 0.000103 | 0.002724 | PPP2CA MAP2K1 CBL SOX2 PML UBC PPP2R1A SUMO1                                 |
| REACTOME | Nucleotide Excision Repair                                                         | 110  | 0.000108 | 0.00273  | SUMO1 RPA2 RPA1 UBC                                                          |
| REACTOME | Deactivation of the beta-catenin transactivating complex                           | 42   | 0.000115 | 0.002826 | SOX2 ASH2L UBC                                                               |
| REACTOME | Signaling by EGFR                                                                  | 42   | 0.000115 | 0.002826 | CBL SH3KBP1 UBC                                                              |
| REACTOME | Cyclin D associated events in G1                                                   | 43   | 0.000123 | 0.002966 | PPP2R1A PPP2CA UBC                                                           |
| REACTOME | G1 Phase                                                                           | 43   | 0.000123 | 0.002966 | PPP2R1A PPP2CA UBC                                                           |
| REACTOME | Diseases of signal transduction                                                    | 359  | 0.000145 | 0.003441 | PPP2CA MAP2K1 CBL UBC PPP2R1A KAT2A                                          |
| GO       | RNA binding                                                                        | 1415 | 1.53E-06 | 0.003908 | PDIA3 UBC TRIP6 CLTC TSR1 TFRC CAVIN1 XRCC5 SFPQ MOV10 TUFM SUMO1 NXF1 YWHAG |
| REACTOME | Signaling by NOTCH                                                                 | 123  | 0.000167 | 0.003928 | ITCH KAT2A MOV10 UBC                                                         |
| REACTOME | Integration of provirus                                                            | 9    | 0.000176 | 0.003977 | XRCC5 HMGA1                                                                  |



|          |                                                                                                           |     |          |          |                                     |
|----------|-----------------------------------------------------------------------------------------------------------|-----|----------|----------|-------------------------------------|
| REACTOME | InIA-mediated entry of Listeria monocytogenes into host cells                                             | 9   | 0.000176 | 0.003977 | CDH1 UBC                            |
| REACTOME | PTK6 Regulates RTKs and Their Effectors AKT1 and DOK1                                                     | 9   | 0.000176 | 0.004019 | CBL UBC                             |
| REACTOME | Regulation of PTEN localization                                                                           | 9   | 0.000176 | 0.004062 | PML UBC                             |
| REACTOME | DNA Damage Bypass                                                                                         | 49  | 0.000182 | 0.004069 | RPA2 RPA1 UBC                       |
| REACTOME | Nonhomologous End-Joining (NHEJ)                                                                          | 50  | 0.000194 | 0.004254 | SUMO1 XRCC5 HIST2H2BE               |
| REACTOME | Toll Like Receptor 4 (TLR4) Cascade                                                                       | 128 | 0.000195 | 0.004254 | PPP2R1A PPP2CA UBC MAP2K1           |
| REACTOME | Initiation of Nuclear Envelope Reformation                                                                | 10  | 0.00022  | 0.004539 | PPP2R1A PPP2CA                      |
| REACTOME | Nuclear Envelope Reassembly                                                                               | 10  | 0.00022  | 0.004539 | PPP2R1A PPP2CA                      |
| REACTOME | Removal of the Flap Intermediate from the C-strand                                                        | 10  | 0.00022  | 0.004582 | RPA2 RPA1                           |
| REACTOME | MASTL Facilitates Mitotic Progression                                                                     | 10  | 0.00022  | 0.004627 | PPP2R1A PPP2CA                      |
| REACTOME | Signaling by Non-Receptor Tyrosine Kinases                                                                | 52  | 0.000218 | 0.004666 | CBL SFPQ UBC                        |
| REACTOME | Signaling by PTK6                                                                                         | 52  | 0.000218 | 0.004666 | CBL SFPQ UBC                        |
| REACTOME | Meiotic recombination                                                                                     | 53  | 0.00023  | 0.004705 | RPA2 RPA1 HIST2H2BE                 |
| REACTOME | Processive synthesis on the C-strand of the telomere                                                      | 11  | 0.000269 | 0.005436 | RPA2 RPA1                           |
| REACTOME | Recruitment and ATM-mediated phosphorylation of repair and signaling proteins at DNA double strand breaks | 57  | 0.000286 | 0.005732 | SUMO1 HIST2H2BE UBC                 |
| REACTOME | DNA Double Strand Break Response                                                                          | 58  | 0.000301 | 0.00598  | SUMO1 HIST2H2BE UBC                 |
| REACTOME | DNA Damage/Telomere Stress Induced Senescence                                                             | 59  | 0.000317 | 0.006233 | HIST1H1A HIST2H2BE HMGA1            |
| REACTOME | HSF1 activation                                                                                           | 12  | 0.000322 | 0.006279 | RPA2 RPA1                           |
| REACTOME | Telomere Maintenance                                                                                      | 61  | 0.00035  | 0.006726 | RPA2 RPA1 HIST2H2BE                 |
| REACTOME | MAPK family signaling cascades                                                                            | 272 | 0.000351 | 0.006726 | PPP2R1A PPP2CA UBC MOV10 MAP2K1     |
| REACTOME | RHO GTPase Effectors                                                                                      | 274 | 0.000363 | 0.006894 | PPP2R1A PPP2CA HIST2H2BE CDH1 YWHAG |

|          |                                                                                       |      |          |          |                                                                 |
|----------|---------------------------------------------------------------------------------------|------|----------|----------|-----------------------------------------------------------------|
| GO       | regulation of transcription, DNA-templated                                            | 898  | 3.51E-06 | 0.006957 | MOV10 PPP2CA TRIP6 CBL HMGA1 SOX2 PML SFPQ CAVIN1 ASH2L PPP2R1A |
| GO       | protein C-terminus binding                                                            | 184  | 3.38E-06 | 0.006957 | PPP2CA MAP2K1 PHB2 CD2AP XRCC5 SUMO1                            |
| REACTOME | ERKs are inactivated                                                                  | 13   | 0.00038  | 0.00709  | PPP2R1A PPP2CA                                                  |
| REACTOME | Inhibition of replication initiation of damaged DNA by RB1/E2F1                       | 13   | 0.00038  | 0.00709  | PPP2R1A PPP2CA                                                  |
| REACTOME | RUNX1 regulates genes involved in megakaryocyte differentiation and platelet function | 63   | 0.000385 | 0.007114 | ASH2L HIST2H2BE MOV10                                           |
| REACTOME | Truncations of AMER1 destabilize the destruction complex                              | 14   | 0.000443 | 0.007204 | PPP2R1A PPP2CA                                                  |
| REACTOME | AMER1 mutants destabilize the destruction complex                                     | 14   | 0.000443 | 0.007204 | PPP2R1A PPP2CA                                                  |
| REACTOME | Toll-Like Receptors Cascades                                                          | 154  | 0.000394 | 0.007226 | PPP2R1A PPP2CA UBC MAP2K1                                       |
| REACTOME | Innate Immune System                                                                  | 1027 | 0.000399 | 0.007252 | PPP2CA MAP2K1 VAPA RAB5C XRCC5 UBC ITCH PPP2R1A RAB7A           |
| REACTOME | Early Phase of HIV Life Cycle                                                         | 14   | 0.000443 | 0.007259 | XRCC5 HMGA1                                                     |
| REACTOME | Gap-filling DNA repair synthesis and ligation in TC-NER                               | 64   | 0.000403 | 0.007265 | RPA2 RPA1 UBC                                                   |
| REACTOME | AXIN mutants destabilize the destruction complex, activating WNT signaling            | 14   | 0.000443 | 0.007314 | PPP2R1A PPP2CA                                                  |
| REACTOME | Mismatch repair (MMR) directed by MSH2:MSH6 (MutSalph)                                | 14   | 0.000443 | 0.007371 | RPA2 RPA1                                                       |
| REACTOME | truncated APC mutants destabilize the destruction complex                             | 14   | 0.000443 | 0.007428 | PPP2R1A PPP2CA                                                  |
| REACTOME | Dual incision in TC-NER                                                               | 65   | 0.000422 | 0.00748  | RPA2 RPA1 UBC                                                   |
| REACTOME | Costimulation by the CD28 family                                                      | 65   | 0.000422 | 0.00748  | TRIB3 PPP2R1A PPP2CA                                            |
| REACTOME | Mismatch repair (MMR) directed by MSH2:MSH3 (MutSbeta)                                | 14   | 0.000443 | 0.007486 | RPA2 RPA1                                                       |
| REACTOME | Removal of the Flap Intermediate                                                      | 14   | 0.000443 | 0.007545 | RPA2 RPA1                                                       |

|          |                                                                                                      |     |          |          |                                       |
|----------|------------------------------------------------------------------------------------------------------|-----|----------|----------|---------------------------------------|
| REACTOME | Signaling by Interleukins                                                                            | 447 | 0.000469 | 0.007576 | PPP2CA MAP2K1 CBL SOX2 UBC<br>PPP2R1A |
| REACTOME | APC truncation mutants have impaired AXIN binding                                                    | 14  | 0.000443 | 0.007605 | PPP2R1A PPP2CA                        |
| REACTOME | AXIN missense mutants destabilize the destruction complex                                            | 14  | 0.000443 | 0.007666 | PPP2R1A PPP2CA                        |
| REACTOME | HDR through Homologous Recombination (HRR)                                                           | 66  | 0.000441 | 0.007727 | RPA2 RPA1 UBC                         |
| REACTOME | Misspliced GSK3beta mutants stabilize beta-catenin                                                   | 15  | 0.00051  | 0.007775 | PPP2R1A PPP2CA                        |
| REACTOME | Mismatch Repair                                                                                      | 15  | 0.00051  | 0.007775 | RPA2 RPA1                             |
| REACTOME | T41 mutants of beta-catenin aren't phosphorylated                                                    | 15  | 0.00051  | 0.00783  | PPP2R1A PPP2CA                        |
| REACTOME | SUMOylation of DNA damage response and repair proteins                                               | 70  | 0.000524 | 0.00788  | SUMO1 PML RPA1                        |
| REACTOME | Apoptosis                                                                                            | 166 | 0.000523 | 0.00788  | HIST1H1A YWHAG CDH1 UBC               |
| REACTOME | S45 mutants of beta-catenin aren't phosphorylated                                                    | 15  | 0.00051  | 0.007886 | PPP2R1A PPP2CA                        |
| REACTOME | phosphorylation site mutants of CTNNB1 are not targeted to the proteasome by the destruction complex | 15  | 0.00051  | 0.007943 | PPP2R1A PPP2CA                        |
| REACTOME | S33 mutants of beta-catenin aren't phosphorylated                                                    | 15  | 0.00051  | 0.008    | PPP2R1A PPP2CA                        |
| REACTOME | S37 mutants of beta-catenin aren't phosphorylated                                                    | 15  | 0.00051  | 0.008059 | PPP2R1A PPP2CA                        |
| REACTOME | Processive synthesis on the lagging strand                                                           | 15  | 0.00051  | 0.008118 | RPA2 RPA1                             |
| REACTOME | Signaling by NOTCH1                                                                                  | 71  | 0.000547 | 0.008158 | ITCH KAT2A UBC                        |
| REACTOME | Programmed Cell Death                                                                                | 169 | 0.00056  | 0.008294 | HIST1H1A YWHAG CDH1 UBC               |
| REACTOME | Clathrin derived vesicle budding                                                                     | 72  | 0.00057  | 0.008327 | TFRC CLTC RAB5C                       |
| REACTOME | trans-Golgi Network Vesicle Budding                                                                  | 72  | 0.00057  | 0.008327 | TFRC CLTC RAB5C                       |
| REACTOME | Formation of Senescence-Associated Heterochromatin Foci (SAHF)                                       | 16  | 0.000582 | 0.0084   | HIST1H1A HMGA1                        |

|          |                                                                  |     |          |          |                             |
|----------|------------------------------------------------------------------|-----|----------|----------|-----------------------------|
| REACTOME | MAP3K8 (TPL2)-dependent MAPK1/3 activation                       | 16  | 0.000582 | 0.0084   | UBC MAP2K1                  |
| REACTOME | Beta-catenin phosphorylation cascade                             | 17  | 0.000659 | 0.00932  | PPP2R1A PPP2CA              |
| REACTOME | Regulation of RUNX1 Expression and Activity                      | 17  | 0.000659 | 0.00932  | PML MOV10                   |
| REACTOME | Signaling by NTRK1 (TRKA)                                        | 76  | 0.000667 | 0.009374 | PPP2R1A PPP2CA CLTC         |
| REACTOME | Platelet sensitization by LDL                                    | 17  | 0.000659 | 0.009381 | PPP2R1A PPP2CA              |
| REACTOME | Signaling by MET                                                 | 77  | 0.000693 | 0.009676 | CBL SH3KBP1 UBC             |
| REACTOME | Transcription-Coupled Nucleotide Excision Repair (TC-NER)        | 78  | 0.00072  | 0.00992  | RPA2 RPA1 UBC               |
| REACTOME | RNA Polymerase I Transcription                                   | 78  | 0.00072  | 0.00992  | KAT2A HIST2H2BE CAVIN1      |
| REACTOME | Constitutive Signaling by Ligand-Responsive EGFR Cancer Variants | 18  | 0.00074  | 0.010011 | CBL UBC                     |
| REACTOME | Signaling by EGFR in Cancer                                      | 18  | 0.00074  | 0.010011 | CBL UBC                     |
| REACTOME | Signaling by Ligand-Responsive EGFR Variants in Cancer           | 18  | 0.00074  | 0.010074 | CBL UBC                     |
| REACTOME | Degradation of beta-catenin by the destruction complex           | 82  | 0.000833 | 0.01119  | PPP2R1A PPP2CA UBC          |
| KEGG     | OOCYTE_MEIOSIS                                                   | 113 | 0.00012  | 0.011196 | PPP2R1A PPP2CA YWHAG MAP2K1 |
| REACTOME | Meiosis                                                          | 83  | 0.000862 | 0.01152  | RPA2 RPA1 HIST2H2BE         |
| REACTOME | G2/M Transition                                                  | 191 | 0.000884 | 0.011741 | PPP2R1A PPP2CA YWHAG UBC    |
| REACTOME | Hedgehog 'on' state                                              | 85  | 0.000924 | 0.011764 | ITCH PTCH1 UBC              |
| REACTOME | DNA Replication Pre-Initiation                                   | 85  | 0.000924 | 0.011764 | RPA2 RPA1 UBC               |
| REACTOME | Regulation of PLK1 Activity at G2/M Transition                   | 85  | 0.000924 | 0.011834 | PPP2R1A YWHAG UBC           |
| REACTOME | M/G1 Transition                                                  | 85  | 0.000924 | 0.011904 | RPA2 RPA1 UBC               |
| REACTOME | Mitotic G2-G2/M phases                                           | 193 | 0.000919 | 0.011975 | PPP2R1A PPP2CA YWHAG UBC    |
| REACTOME | Lagging Strand Synthesis                                         | 20  | 0.000917 | 0.011984 | RPA2 RPA1                   |
| REACTOME | CTLA4 inhibitory signaling                                       | 20  | 0.000917 | 0.012021 | PPP2R1A PPP2CA              |
| REACTOME | PCNA-Dependent Long Patch Base Excision Repair                   | 21  | 0.001012 | 0.012728 | RPA2 RPA1                   |
| REACTOME | Regulation of signaling by CBL                                   | 21  | 0.001012 | 0.012728 | CBL UBC                     |

|          |                                                                              |      |          |          |                                                   |
|----------|------------------------------------------------------------------------------|------|----------|----------|---------------------------------------------------|
| REACTOME | Chromosome Maintenance                                                       | 88   | 0.001022 | 0.012783 | RPA2 RPA1 HIST2H2BE                               |
| REACTOME | Negative regulation of the PI3K/AKT network                                  | 89   | 0.001056 | 0.013057 | TRIB3 PPP2R1A PPP2CA                              |
| REACTOME | M Phase                                                                      | 347  | 0.001056 | 0.013057 | PPP2R1A PPP2CA YWHAG HIST2H2BE UBC                |
| REACTOME | Oxidative Stress Induced Senescence                                          | 90   | 0.001091 | 0.01341  | HIST2H2BE MOV10 UBC                               |
| REACTOME | ERK/MAPK targets                                                             | 22   | 0.001111 | 0.013509 | PPP2R1A PPP2CA                                    |
| REACTOME | E2F mediated regulation of DNA replication                                   | 22   | 0.001111 | 0.013509 | PPP2R1A PPP2CA                                    |
| REACTOME | Signaling by NTRKs                                                           | 92   | 0.001162 | 0.013972 | PPP2R1A PPP2CA CLTC                               |
| REACTOME | Regulation of TP53 Activity through Phosphorylation                          | 92   | 0.001162 | 0.013972 | RPA2 RPA1 UBC                                     |
| REACTOME | DARPP-32 events                                                              | 24   | 0.001324 | 0.015655 | PPP2R1A PPP2CA                                    |
| REACTOME | Telomere C-strand (Lagging Strand) Synthesis                                 | 24   | 0.001324 | 0.015655 | RPA2 RPA1                                         |
| REACTOME | Anchoring of the basal body to the plasma membrane                           | 96   | 0.001314 | 0.01571  | IQCB1 PPP2R1A YWHAG                               |
| REACTOME | RUNX1 regulates transcription of genes involved in differentiation of HSCs   | 97   | 0.001354 | 0.015922 | ITCH HIST2H2BE UBC                                |
| REACTOME | Resolution of AP sites via the multiple-nucleotide patch replacement pathway | 25   | 0.001437 | 0.016629 | RPA2 RPA1                                         |
| REACTOME | Cyclin A/B1/B2 associated events during G2/M transition                      | 25   | 0.001437 | 0.016629 | PPP2R1A PPP2CA                                    |
| REACTOME | Nuclear Events (kinase and transcription factor activation)                  | 25   | 0.001437 | 0.016718 | PPP2R1A PPP2CA                                    |
| REACTOME | Mitotic Prophase                                                             | 100  | 0.001478 | 0.017011 | PPP2R1A PPP2CA HIST2H2BE                          |
| REACTOME | Calnexin/calreticulin cycle                                                  | 26   | 0.001554 | 0.017798 | PDIA3 UBC                                         |
| GO       | error-prone translesion synthesis                                            | 21   | 1.38E-05 | 0.018883 | RPA2 RPA1 UBC                                     |
| GO       | negative regulation of DNA binding transcription factor activity             | 65   | 1.37E-05 | 0.018883 | PHB2 SUMO1 NROB2 PTCH1                            |
| GO       | protein localization to chromosome                                           | 3    | 1.48E-05 | 0.018896 | RPA2 RPA1                                         |
| GO       | cytosol                                                                      | 4995 | 1.14E-05 | 0.019158 | KRT8 CLTC HMGA1 PML IQCB1 PPP2R1A GIPC1 HIST2H2BE |

|          |                                                                                         |      |          |          |                                                                                                                        |
|----------|-----------------------------------------------------------------------------------------|------|----------|----------|------------------------------------------------------------------------------------------------------------------------|
|          |                                                                                         |      |          |          | LATS1 PPP2CA TRIP6 CBL TSR1<br>TRIB3 ITCH SH3KBP1 CAVIN1<br>NXF1 RAB7A MAP2K1 MOV10<br>SOX2 XRCC5 UBC YWHAG            |
| GO       | error-free translesion<br>synthesis                                                     | 20   | 1.18E-05 | 0.019158 | RPA2 RPA1 UBC                                                                                                          |
| REACTOME | RAF/MAP kinase cascade                                                                  | 228  | 0.001699 | 0.019353 | PPP2R1A PPP2CA UBC MAP2K1                                                                                              |
| REACTOME | SUMO E3 ligases<br>SUMOylate target<br>proteins                                         | 106  | 0.001747 | 0.019789 | SUMO1 PML RPA1                                                                                                         |
| REACTOME | Developmental Biology                                                                   | 1023 | 0.001816 | 0.020472 | KRT8 MAP2K1 CLTC HIST2H2BE<br>SOX2 SH3KBP1 UBC ASH2L                                                                   |
| REACTOME | Reproduction                                                                            | 108  | 0.001843 | 0.020554 | RPA2 RPA1 HIST2H2BE                                                                                                    |
| REACTOME | MAPK1/MAPK3 signaling                                                                   | 233  | 0.001839 | 0.020554 | PPP2R1A PPP2CA UBC MAP2K1                                                                                              |
| REACTOME | Signaling by Rho GTPases                                                                | 402  | 0.002019 | 0.022405 | PPP2R1A PPP2CA HIST2H2BE<br>CDH1 YWHAG                                                                                 |
| REACTOME | SUMOylation                                                                             | 112  | 0.002044 | 0.022456 | SUMO1 PML RPA1                                                                                                         |
| REACTOME | Hedgehog 'off' state                                                                    | 112  | 0.002044 | 0.022456 | ITCH PTCH1 UBC                                                                                                         |
| REACTOME | Extension of Telomeres                                                                  | 30   | 0.002069 | 0.02261  | RPA2 RPA1                                                                                                              |
| REACTOME | Signaling by the B Cell<br>Receptor (BCR)                                               | 113  | 0.002097 | 0.022801 | CBL SH3KBP1 UBC                                                                                                        |
| REACTOME | Disassembly of the<br>destruction complex and<br>recruitment of AXIN to the<br>membrane | 31   | 0.002208 | 0.023425 | PPP2R1A PPP2CA                                                                                                         |
| REACTOME | Pre-NOTCH Transcription<br>and Translation                                              | 31   | 0.002208 | 0.023425 | KAT2A MOV10                                                                                                            |
| REACTOME | MAPK targets/ Nuclear<br>events mediated by MAP<br>kinases                              | 31   | 0.002208 | 0.02354  | PPP2R1A PPP2CA                                                                                                         |
| REACTOME | TGF-beta receptor<br>signaling activates SMADs                                          | 31   | 0.002208 | 0.023657 | CBL UBC                                                                                                                |
| REACTOME | Activated NOTCH1<br>Transmits Signal to the<br>Nucleus                                  | 31   | 0.002208 | 0.023774 | ITCH UBC                                                                                                               |
| GO       | nucleoplasm                                                                             | 3162 | 2.14E-05 | 0.023872 | RPA2 KRT8 RPA1 TSR1<br>HIST2H2BE HMGA1 SOX2 ITCH<br>PML XRCC5 SFPQ CAVIN1 NR0B2<br>UBC IQCB1 ASH2L KAT2A<br>SUMO1 NXF1 |
| GO       | nucleotide-excision repair,<br>DNA gap filling                                          | 24   | 2.08E-05 | 0.023872 | RPA2 RPA1 UBC                                                                                                          |
| REACTOME | DNA strand elongation                                                                   | 32   | 0.002352 | 0.024829 | RPA2 RPA1                                                                                                              |
| BIOCARTA | CHREBP2_PATHWAY                                                                         | 42   | 0.000115 | 0.024937 | PPP2R1A PPP2CA YWHAG                                                                                                   |
| REACTOME | Synthesis of DNA                                                                        | 119  | 0.002429 | 0.025518 | RPA2 RPA1 UBC                                                                                                          |

|          |                                                                                    |      |          |          |                                                      |
|----------|------------------------------------------------------------------------------------|------|----------|----------|------------------------------------------------------|
| REACTOME | Activation of the pre-replicative complex                                          | 33   | 0.0025   | 0.025765 | RPA2 RPA1                                            |
| REACTOME | Oncogene Induced Senescence                                                        | 33   | 0.0025   | 0.025765 | MOV10 UBC                                            |
| REACTOME | Antigen activates B Cell Receptor (BCR) leading to generation of second messengers | 33   | 0.0025   | 0.025888 | CBL SH3KBP1                                          |
| REACTOME | Post-translational protein modification                                            | 1331 | 0.002495 | 0.026013 | PDIA3 RPA1 HIST2H2BE RAB5C PML UBC KAT2A SUMO1 RAB7A |
| REACTOME | Negative regulators of DDX58/IFIH1 signaling                                       | 34   | 0.002653 | 0.027078 | ITCH UBC                                             |
| REACTOME | Signaling by WNT in cancer                                                         | 34   | 0.002653 | 0.027078 | PPP2R1A PPP2CA                                       |
| REACTOME | NOD1/2 Signaling Pathway                                                           | 35   | 0.00281  | 0.02841  | ITCH UBC                                             |
| REACTOME | N-glycan trimming in the ER and Calnexin/Calreticulin cycle                        | 35   | 0.00281  | 0.02841  | PDIA3 UBC                                            |
| GO       | second-messenger-mediated signaling                                                | 4    | 2.96E-05 | 0.029351 | PPP2R1A PPP2CA                                       |
| GO       | PML body organization                                                              | 4    | 2.96E-05 | 0.029351 | PML SUMO1                                            |
| REACTOME | DNA Replication                                                                    | 127  | 0.002921 | 0.029398 | RPA2 RPA1 UBC                                        |
| BIOCARTA | SPRY_PATHWAY                                                                       | 18   | 0.00074  | 0.029878 | CBL MAP2K1                                           |
| BIOCARTA | TGFB_PATHWAY                                                                       | 19   | 0.000826 | 0.029878 | CDH1 MAP2K1                                          |
| REACTOME | HDR through Single Strand Annealing (SSA)                                          | 37   | 0.003136 | 0.030986 | RPA2 RPA1                                            |
| REACTOME | Base Excision Repair                                                               | 37   | 0.003136 | 0.030986 | RPA2 RPA1                                            |
| REACTOME | Resolution of Abasic Sites (AP sites)                                              | 37   | 0.003136 | 0.031128 | RPA2 RPA1                                            |
| REACTOME | Activation of ATR in response to replication stress                                | 37   | 0.003136 | 0.031271 | RPA2 RPA1                                            |
| BIOCARTA | TEL_PATHWAY                                                                        | 18   | 0.00074  | 0.032126 | PPP2CA XRCC5                                         |
| KEGG     | LONG_TERM_DEPRESSION                                                               | 70   | 0.000524 | 0.032511 | PPP2R1A PPP2CA MAP2K1                                |
| REACTOME | Presynaptic phase of homologous DNA pairing and strand exchange                    | 39   | 0.003479 | 0.034221 | RPA2 RPA1                                            |
| GO       | nucleotide-excision repair, preincision complex assembly                           | 29   | 3.73E-05 | 0.035052 | RPA2 RPA1 UBC                                        |
| REACTOME | PTEN Regulation                                                                    | 138  | 0.003691 | 0.036137 | PML MOV10 UBC                                        |
| KEGG     | PATHWAYS_IN_CANCER                                                                 | 325  | 0.000788 | 0.036635 | CBL PML CDH1 PTCH1 MAP2K1                            |
| REACTOME | Signaling by ERBB4                                                                 | 41   | 0.003839 | 0.037421 | ITCH UBC                                             |
| REACTOME | Homologous DNA Pairing and Strand Exchange                                         | 42   | 0.004025 | 0.03906  | RPA2 RPA1                                            |

|          |                                                          |     |          |          |                 |
|----------|----------------------------------------------------------|-----|----------|----------|-----------------|
| REACTOME | Beta-catenin independent WNT signaling                   | 143 | 0.004078 | 0.039392 | CLTC MOV10 UBC  |
| BIOCARTA | PML_PATHWAY                                              | 17  | 0.000659 | 0.040157 | PML SUMO1       |
| BIOCARTA | CBL_PATHWAY                                              | 13  | 0.00038  | 0.041239 | CBL SH3KBP1     |
| REACTOME | TBC/RABGAPs                                              | 44  | 0.00441  | 0.042226 | RAB5C RAB7A     |
| REACTOME | HIV Life Cycle                                           | 147 | 0.004404 | 0.042226 | XRCC5 HMGA1 UBC |
| REACTOME | Entry of Influenza Virion into Host Cell via Endocytosis | 2   | 0.004495 | 0.042664 | CLTC            |
| REACTOME | Signaling by Hedgehog                                    | 148 | 0.004488 | 0.042664 | ITCH PTCH1 UBC  |
| REACTOME | NOTCH1 Intracellular Domain Regulates Transcription      | 45  | 0.004608 | 0.043549 | KAT2A UBC       |
| KEGG     | MISMATCH_REPAIR                                          | 23  | 0.001215 | 0.045209 | RPA2 RPA1       |
| REACTOME | Interleukin-3, 5 and GM-CSF signaling                    | 47  | 0.005018 | 0.047006 | CBL UBC         |
| REACTOME | Pre-NOTCH Expression and Processing                      | 47  | 0.005018 | 0.047006 | KAT2A MOV10     |
| REACTOME | Signaling by NOTCH3                                      | 48  | 0.005228 | 0.048769 | KAT2A UBC       |



## Supplemental Figure Legend

**Figure S1: Efficiency of gene knockdown by inhibitory RNA in pulmonary vascular cell types.** In all panels, mean expression of a given target gene transcript in the control group (si-NC) was assigned a fold change of 1, to which corresponding gene expression after gene knockdown was compared. Data are expressed as the mean  $\pm$  SD (\*P < 0.05, \*\*P < 0.01, \*\*\*P < 0.001) of 3 independent experiments. Paired samples were compared by 2-tailed Student's t test.

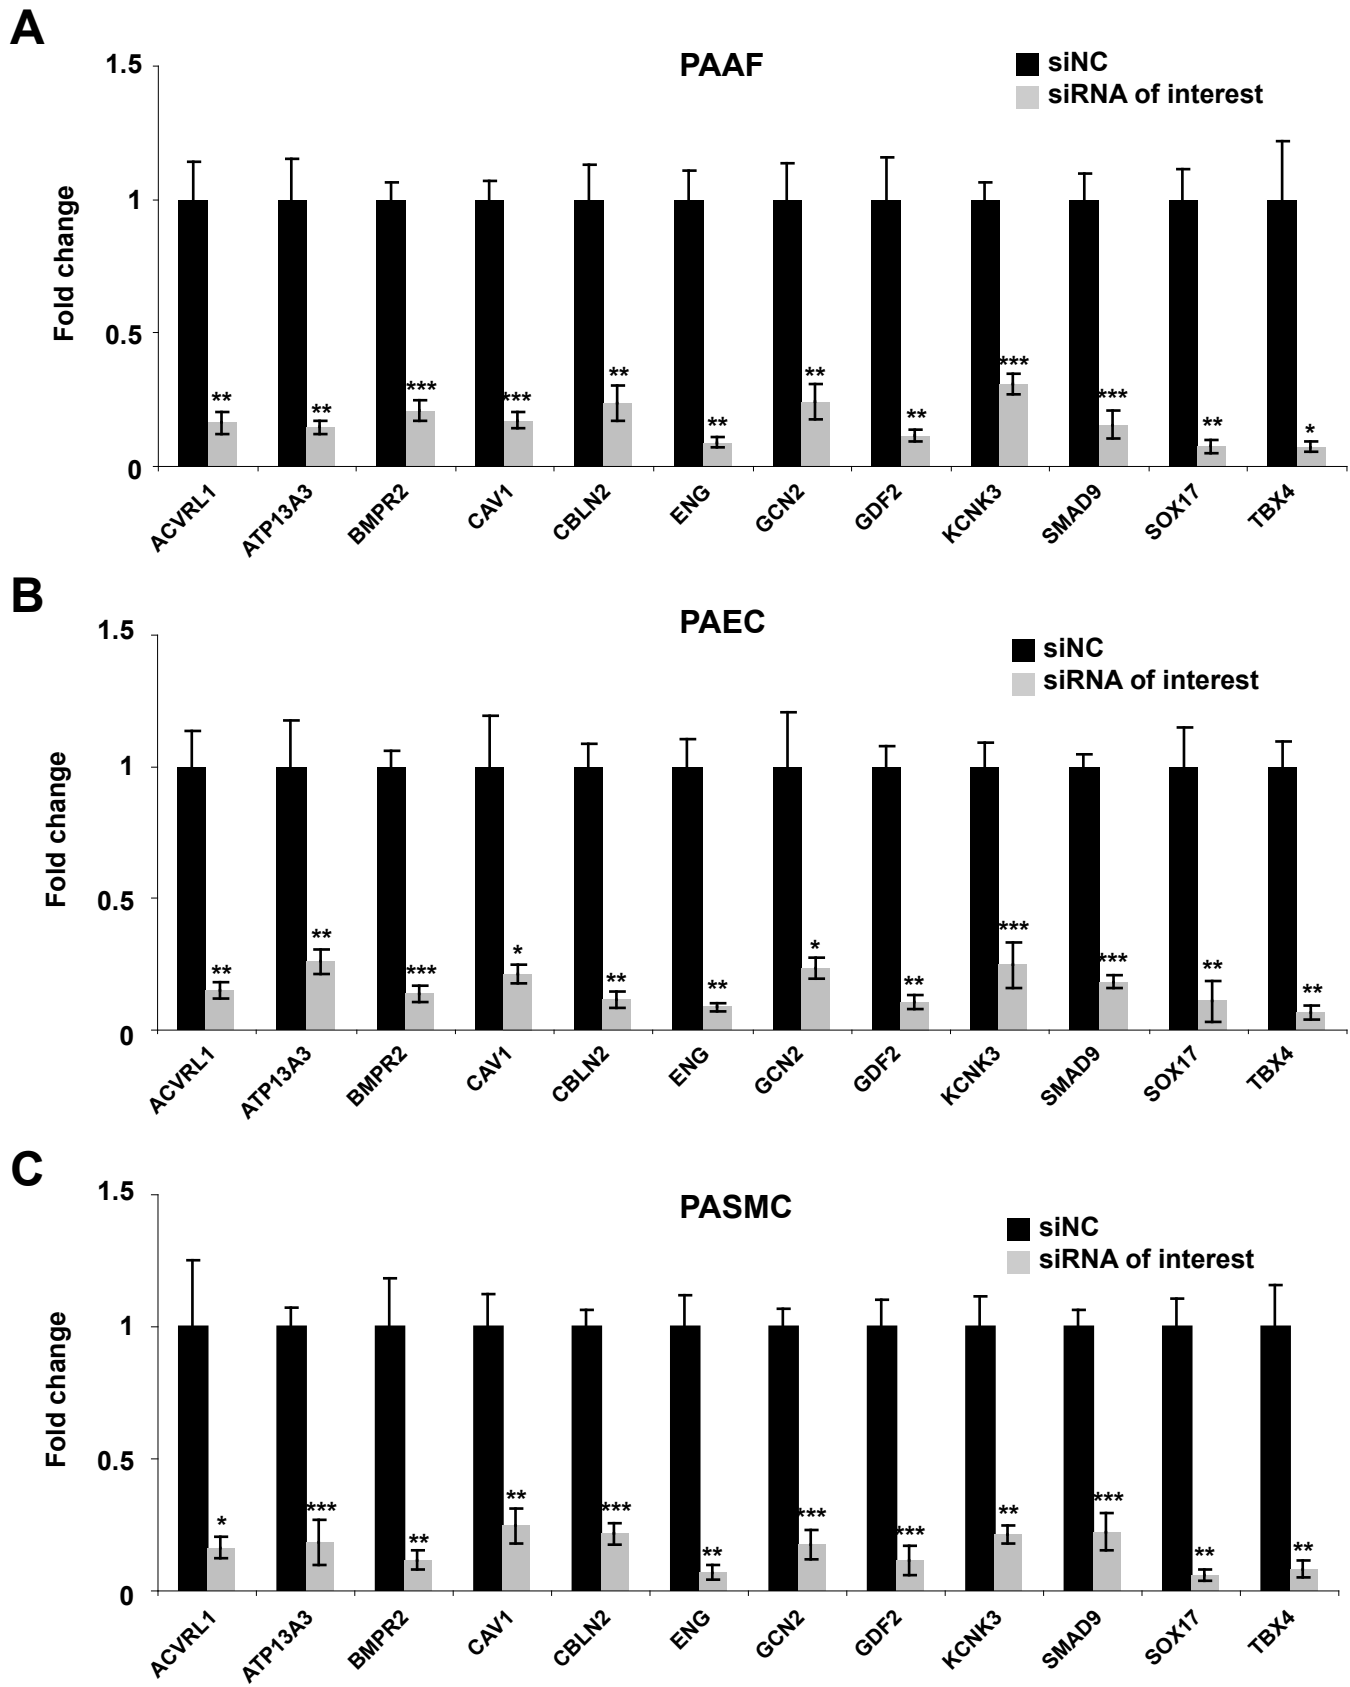

Figure S1
